1 **Mapping the immunogenic landscape of near-native HIV-1 envelope trimers in non-human**  
2 **primates**

3

4 Christopher A. Cottrell<sup>1,2,3</sup>, Jelle van Schooten<sup>4</sup>, Charles A. Bowman<sup>1</sup>, Meng Yuan<sup>1</sup>, David Oyen<sup>1</sup>,  
5 Mia Shin<sup>1</sup>, Robert Morpurgo<sup>4</sup>, Patricia van der Woude<sup>4</sup>, Marielle van Breemen<sup>4</sup>, Jonathan L.  
6 Torres<sup>1</sup>, Raj Patel<sup>1</sup>, Justin Gross<sup>1</sup>, Leigh M. Sewall<sup>1</sup>, Jeffrey Coppins<sup>1</sup>, Gabriel Ozorowski<sup>1,2,3</sup>, Bartek  
7 Nogal<sup>1,2,3</sup>, Devin Sok<sup>2,3,5</sup>, Eva G. Rakasz<sup>6</sup>, Celia Labranche<sup>7</sup>, Vladimir Vigdorovich<sup>12</sup>, Scott  
8 Christley<sup>13</sup>, Diane G. Carnathan<sup>3,14</sup>, D. Noah Sather<sup>12</sup>, David Montefiori<sup>7,8</sup>, Guido Silvestri<sup>3,14</sup>,  
9 Dennis R. Burton<sup>2,3,5,9</sup>, John P. Moore<sup>10</sup>, Ian A. Wilson<sup>1,2,3,11</sup>, Rogier W. Sanders<sup>1,10#</sup>, Andrew B.  
10 Ward<sup>1,2,3#</sup>, Marit J. van Gils<sup>4#</sup>

11 <sup>1</sup> Department of Integrative Structural and Computational Biology, The Scripps Research Institute,  
12 La Jolla, CA 92037, USA.

13 <sup>2</sup> IAVI Neutralizing Antibody Center, The Scripps Research Institute, La Jolla, CA 92037, USA.

14 <sup>3</sup> Consortium for HIV/AIDS Vaccine Development, The Scripps Research Institute, La Jolla, CA  
15 92037, USA.

16 <sup>4</sup> Department of Medical Microbiology, Amsterdam UMC, University of Amsterdam, 1105 AZ  
17 Amsterdam, The Netherlands.

18 <sup>5</sup> Department of Immunology and Microbiology, The Scripps Research Institute, La Jolla, CA  
19 92037, USA.

20 <sup>6</sup> Wisconsin National Primate Research Center, University of Wisconsin, Madison, WI 53715, USA.

21 <sup>7</sup> Department of Surgery, Duke University Medical Center, Durham, NC 27710, USA.

22 <sup>8</sup> Duke Human Vaccine Institute, Duke University Medical Center, Durham, NC 27710, USA.

23 <sup>9</sup> The Ragon Institute of Massachusetts General Hospital, Massachusetts Institute of Technology  
24 and Harvard University, Cambridge, MA 02139, USA.

25 <sup>10</sup> Department of Microbiology and Immunology, Weill Medical College of Cornell University, New  
26 York, NY 10021, USA

27 <sup>11</sup> The Skaggs Institute for Chemical Biology, The Scripps Institute, La Jolla, CA 92037, USA

28 <sup>12</sup> Center for Global Infectious Disease Research, Seattle Children's Research Institute, Seattle,  
29 WA 98109, USA.

30 <sup>13</sup> Department of Population and Data Sciences, UT Southwestern Medical Center, Dallas, TX  
31 75390, USA

32 <sup>14</sup> Yerkes National Primate Research Center, Emory University, Atlanta, GA 30322, USA;

33

34 # corresponding author; [m.j.vangils@amc.uva.nl](mailto:m.j.vangils@amc.uva.nl); [andrew@scripps.edu](mailto:andrew@scripps.edu); [r.w.sanders@amc.uva.nl](mailto:r.w.sanders@amc.uva.nl)

35 **Summary**

36 The induction of broad and potent immunity by vaccines is the key focus of research efforts  
37 aimed at protecting against HIV-1 infection. Soluble native-like HIV-1 envelope glycoproteins  
38 have shown promise as vaccine candidates as they can induce potent autologous neutralizing  
39 responses in rabbits and non-human primates. In this study, monoclonal antibodies were isolated  
40 and characterized from rhesus macaques immunized with the BG505 SOSIP.664 trimer to better  
41 understand vaccine-induced antibody responses. Our studies reveal a diverse landscape of  
42 antibodies recognizing immunodominant strain-specific epitopes and non-neutralizing neo-  
43 epitopes. Additionally, we isolated a subset of mAbs against an epitope cluster at the gp120-gp41  
44 interface that recognize the highly conserved fusion peptide and the glycan at position 88 and  
45 have characteristics akin to several human-derived broadly neutralizing antibodies.

46

## 47 **Introduction**

48 HIV-1 continues to cause significant morbidity and mortality around the world with an estimated  
49 1.7 million new infections in 2018 (UNAIDS, 2019), which emphasizes the need for an effective  
50 prophylactic vaccine. The HIV-1 envelope glycoprotein (Env) is the sole target for neutralizing  
51 antibody (NAb) responses. Studies of infected patients have led to the isolation of NABs against  
52 multiple different epitopes on the Env surface that are capable of both neutralizing most  
53 circulating strains and providing passive protection against repeated viral challenges in non-  
54 human primates (NHPs) (Burton and Hangartner, 2016; Moldt et al., 2016; Pegu et al., 2019; Wu,  
55 2018). Extensive research efforts, including structure-based engineering of Env immunogens, are  
56 currently directed towards developing vaccine strategies to successfully elicit broadly  
57 neutralizing antibodies (bNAbs) against specific Env epitopes (de Taeye et al., 2015; Escolano et  
58 al., 2019; Escolano et al., 2016; Jardine et al., 2016; Kong et al., 2019; Steichen et al., 2016;  
59 Torrents de la Pena et al., 2017). The development and structural determination of soluble  
60 native-like Env trimer mimics, particularly ones based on the SOSIP technology, has provided a  
61 platform for structure-based immunogen design (Julien et al., 2013a; Lyumkis et al., 2013;  
62 Pancera et al., 2014; Sanders et al., 2013). NABs induced by SOSIP trimers in NHPs can protect  
63 against challenge with an autologous Simian-Human Immunodeficiency virus (SHIV) (Pauthner et  
64 al., 2017; Pauthner et al., 2019). However, as NABs with the required breadth of activity have not  
65 yet been induced in trimer-immunized animals, improvements to current vaccine design and  
66 delivery strategies are clearly needed.

67 Characterizing the antibody response to SOSIP trimers may provide useful information for  
68 guiding immunogen design. Initial analyses of rabbits immunized with BG505 SOSIP.664 trimers,

69 including studies of isolated monoclonal antibodies (mAbs), showed that autologous NAbs  
70 targeted a large hole in the glycan shield of the BG505 virus caused by the absence of  
71 glycosylation sites at positions 241 and 289 (Klasse et al., 2018; McCoy et al., 2016). The 241  
72 glycan is highly conserved (97%) among HIV-1 strains and while the 289 glycan is less conserved,  
73 it is still present in 79% of viruses. The required absence of typically conserved glycans explains  
74 why the NAbs isolated from the trimer-immunized rabbits lack breadth (McCoy et al., 2016). Later  
75 studies involving BG505 trimer-immunized rabbits, guinea pigs, and NHPs have identified  
76 additional narrow-specificity neutralizing serum responses that recognize epitopes in the C3/V4,  
77 C3/V5, and V1 regions, with mAbs isolated from guinea pigs targeting the C3/V4 epitope (Cirelli  
78 et al., 2019; Klasse et al., 2018; Lei et al., 2019; Nogal et al., 2019; Pauthner et al., 2017).

79         Here, we describe a detailed characterization of neutralizing and non-neutralizing mAbs  
80 isolated from two rhesus macaques (RMs) previously immunized with the BG505 SOSIP.664  
81 trimer (Sanders et al., 2015). We identified multiple mAbs targeting the 289-glycan hole on the  
82 BG505 SOSIP.664 trimer or a neo-epitope cluster at the base of the trimer. The most potent NAb  
83 isolated targeted the gp120/gp41 interface at an epitope that significantly overlaps with the  
84 epitope of human bNAb VRC34 (Kong et al., 2016). Insights from the induction of these NAbs  
85 through vaccination can be further used to develop immunogens and immunization strategies to  
86 induce cross-reactive antibody responses.

87

## 88 **Results**

### 89 **Indian origin rhesus macaque BCR germline database**

90 The majority of bNAbs isolated from HIV-infected patients have exceedingly high levels of  
91 somatic hypermutation (SHM) (Landais and Moore, 2018; Wu, 2018). Accurately measuring levels  
92 of SHM elicited during immunization experiments is a critical component to ensuring the elicited  
93 antibodies are acquiring the level of mutations associated with neutralization breadth. To  
94 accurately measure the extent of SHM, the mAb sequences that we obtained from BG505  
95 SOSIP.664 trimer-immunized RMs required comparison to a germline B-cell receptor (BCR)  
96 reference database. The IMGT reference database for RMs is incomplete and contains a mixture  
97 of genes/alleles from both Chinese and Indian origin animals. Given the high levels of genetic  
98 diversity in the Immunoglobulin (Ig) loci among RMs from different origins (Corcoran et al., 2016)  
99 and the general use of Indian origin RMs in most HIV-1 immunization experiments conducted in  
100 the United States, we constructed a germline database containing gene/alleles from only Indian  
101 origin RMs. The gene/alleles from the published database (Vigdorovich et al., 2016) were aligned  
102 to the Mmul\_8.0.1 Indian origin RM genome assembly using BLAST (Johnson et al., 2008; Zimin  
103 et al., 2014). Sequences that were not identical to the reference genome were eliminated.  
104 Additional genes/alleles from publicly available Indian origin RM genomic DNA sequencing  
105 datasets (Cirelli et al., 2019; Ramesh et al., 2017) were added to the database. After duplicates  
106 were removed, the resulting new database contained 189 IGHV, 70 IGHD, 9 IGHJ, 188 IGKV, 5  
107 IGKJ, 147 IGLV, and 13 IGLJ genes/alleles (Table S1).

108         Recent advances in BCR repertoire sequencing and analysis have enabled the use of next-  
109 generation sequencing (NGS) datasets for inferring novel genes/alleles (Corcoran et al., 2016;

110 Gadala-Maria et al., 2015; Ralph and Matsen, 2018). Using the database described above as an  
111 initial database, we performed IgDiscover analysis (Corcoran et al., 2016) on IgM BCR sequences  
112 derived from five Indian origin RMs. Additionally, we performed IgDiscover analysis on previously  
113 obtained Indian origin RM BCR NGS datasets that were downloaded from the NCBI sequence read  
114 archive (Corcoran et al., 2016; Guo et al., 2015) or obtained directly from the study authors  
115 (Vigdorovich et al., 2016). Inferred genes/alleles were kept if they were detected in more than  
116 one animal or if they were identical to RM genes/alleles that were previously deposited in the  
117 NCBI database. We added 113 IGHV, 18 IGKV, and 18 IGLV genes/alleles to our germline database  
118 (<http://ward.scripps.edu/gld/>) resulting in a total of 302 IGHV, 206 IGKV, and 165 IGLV  
119 genes/alleles. This updated database was then converted into a custom IgBLAST database and  
120 subsequently used to analyze our BG505-specific mAbs sequences with IgBLAST (Ye et al., 2013).

121

### 122 **Antigen-specific mAbs isolated from BG505 SOSIP.664 trimer-immunized RMs**

123 To better understand the immunogenicity of the BG505 SOSIP.664 trimers in previously  
124 immunized Indian origin RMs (Sanders et al., 2015) we selected the two animals (rh1987 and  
125 rh2011) with the highest serum neutralization activity against the autologous BG505.T332N  
126 pseudovirus for in-depth mAb analysis. Peripheral blood mononuclear cells (PBMCs) from the  
127 following time points were selected for BG505 SOSIP.664 trimer-specific IgG-positive single  
128 memory B-cell sorting: (i) two weeks prior to the fourth immunization (week 22), (ii) 1 week after  
129 the fourth immunization (week 25) and (iii) 1 week after the sixth immunization (week 53) (Fig  
130 1A). In total, 25 and 17 mAbs were cloned from RMs rh1987 and rh2011, respectively (Fig 1B).

131           The BG505-specific mAb sequences were analysed using our germline database and  
132 shown to be evenly distributed between kappa and lambda light chains (KC and LC) usage (Fig  
133 1B). For animal rh1987, 11 KC and 14 LC mAbs were isolated. Their average heavy chain (HC) SHM  
134 (nucleotide level) was 6.4% (range: 2.1%-10.2%) with an average HC complementarity-  
135 determining region 3 (CDR-H3) length of 15 amino acids (aa) (range: 7-23) (Table S2). The rh1987  
136 KC mAbs utilized HC variable genes from the IGHV3 and IGHV4 families and predominantly used  
137 KC V genes from the IGKV1 family (Table S2). All of the rh1987 KC mAbs had a CDR-L3 length of 9  
138 aa and their average KC SHM (nucleotide level) was 4.7% (range: 2.6%-6.0%) (Table S2). A single  
139 clonal family with 4 members (RM19A) was detected among rh1987 KC mAbs with members  
140 isolated from both week 22 and week 25 samples (Table S2). The rh1987 LC mAbs used HC V  
141 genes from the IGHV1, IGHV3 and IGHV4 families and LC V genes mainly from the IGLV2 gene  
142 family (Table S2). The rh1987 LC mAbs had an average CDR-L3 length of 10 aa (range: 9-11) with  
143 an average LC SHM (nucleotide level) of 3.8% (range: 0.9%-10.6%) (Table S2). Two clonal families  
144 (RM19B [2 members] and RM19C [4 members]) were identified among the rh1987 LC mAbs  
145 isolated from weeks 22 and 25 (Table S2).

146           For animal rh2011, 8 KC and 9 LC mAbs were isolated. Their average HC SHM rate  
147 (nucleotide level) was 6.1% (range: 3.0%-9.1%) and they had an average CDR-H3 length of 17 aa  
148 (range 10-20) (Table S2). Half of the rh2011 KC mAbs belonged to the RM20E clonal family,  
149 isolated from the week 53 sample. The RM20E clonal family utilized the HC V gene IGHV5-  
150 ABI\*01\_S2502 and the KC V gene LJI.Rh\_IGKV2.71 (Table S2). Overall, the rh2011 KC mAbs had  
151 an average KC SHM rate (nucleotide level) of 4.1% (range: 3.0%-5.3%) and a CDR-L3 length of 9  
152 aa (Table S2). Among the rh2011 LC mAbs, two clonal families (RM20A [4 members] and RM20B



153 [2 members]) were isolated from weeks 22 and 25 samples (Table S2). Overall, the rh2011 mAbs  
154 had an average LC SHM rate (nucleotide level) of 4.4% (range: 2.1%-6.4%) and an average CDR  
155 L3 length of 10.6 aa (range: 9-11) (Table S2).

156

### 157 **BG505-specific mAbs recognize multiple Env regions**

158 All 42 mAbs bound to the BG505 SOSIP.664 trimer in ELISA, but only 11 of the 25 mAbs from  
159 rh1987 and 9 of the 17 from rh2011 bound the corresponding gp120 monomer (Fig S1). The mAbs  
160 were tested for neutralization activity against the autologous BG505 clade A Tier 2 virus, its  
161 glycan-611 knockout variant (N611A), and the heterologous SF162 clade B Tier 1A virus. Only a  
162 few mAbs, 4 from rh1987 and 2 from rh2011, neutralized the BG505.T332N pseudovirus but one  
163 of them, RM20F from rh2011, did so potently (Fig 1C). Two mAbs from rh1987 and 4 from rh2011  
164 were able to potently neutralize the N611A-variant despite lacking activity against the autologous  
165 BG505.T332N pseudovirus (Fig 1C and D). None of the 42 mAbs neutralized the easy-to-neutralize  
166 heterologous SF162 virus (Fig 1C and D).

167

### 168 **EM-based epitope mapping revealed mAbs isolated from both animals target 4 distinct, but** 169 **somewhat overlapping epitopes**

170 We used low resolution, negative stain, single particle electron microscopy (EM) to visualize  
171 where a representative subset of the isolated mAbs bound on the surface of the BG505 SOSIP  
172 trimer. The majority (55%) of mAbs isolated were non-neutralizing antibodies that bound to the  
173 base of the BG505 SOSIP trimer (Figs 2A, S2, and Table S2) at a neo-epitope cluster that is  
174 occluded by the viral membrane on HIV-1 virions. Fabs bound to the base of the soluble trimer

175 via multiple angles of approach and utilized a variety of heavy and light chain genes/alleles to do  
176 so (Fig 2A and Table S2). The extent of SHM in the base-targeting mAbs ranged from 2-10% in the  
177 HC and 1-11% in the light chain (Table S2). Previous studies examining the polyclonal antibody  
178 responses elicited by the BG505 SOSIP trimers in rabbits and RMs have shown that epitopes at  
179 the base of the soluble trimer were targeted in every single animal analyzed (Bianchi et al., 2018;  
180 Cirelli et al., 2019; Nogal et al., 2019). Taken together with our new data, it is clear that the base  
181 of SOSIP trimers contain an immunodominant non-neutralizing neo-epitope cluster that is easily  
182 targeted by a variety of precursor BCRs in different species.

183 A subset of mAbs from both animals bound to an epitope near the N611 glycan (Figs 2B  
184 and S2). These mAbs were not capable of neutralizing the autologous BG505.T332N pseudovirus  
185 but neutralized the BG505 N611A variant (Fig 1C and D). Two additional mAbs isolated from  
186 rh2011 (RM20F and RM20H) bound to an epitope near the fusion peptide (FP) and were capable  
187 of neutralizing both the autologous and N611A BG505 pseudoviruses, but the latter virus more  
188 potently (Figs 2C and S2). MAbs from both animals targeted the 289-glycan hole epitope on  
189 BG505, with some, isolated from rh1987, showing weak neutralization of the autologous  
190 BG505.T332N pseudovirus (Figs 1C and 2D; Table S2). Multiple germline genes/alleles were used  
191 to target the same 289-glycan hole epitope (Table S2).

192 To further assess the epitopes targeted following immunization with the BG505  
193 SOSIP.664 trimer and verify that we isolated mAbs representative of the full serum antibody  
194 response, we performed electron microscopy polyclonal epitope mapping (EMPEM) (Bianchi et  
195 al., 2018) using week 28 serum. EMPEM revealed that similar epitopes were targeted in both

196 animals and that the epitope assignments correlated well with the epitopes ascribed to mAbs  
197 generated by antigen-specific B-cell sorting (Fig 2E versus S2).

198 A previous analysis of purified serum IgGs from RMs rh1987 and rh2011 identified the  
199 C3/V5 epitope as a major target for neutralization activity (Klasse et al., 2018); however, none of  
200 the mAbs isolated here targeted the C3/V5 epitope nor were they detected by EMPER. While  
201 low resolution, negative stain EM provides valuable information on where mAbs bind on the  
202 surface of HIV-1 Env, the molecular detail necessary to guide structure-based immunogen design  
203 requires high-resolution structural data obtained by cryoEM and x-ray crystallography. We  
204 therefore selected three Fabs (RM20J, RM20F, and RM20E1) that bound to different epitopes for  
205 high-resolution structural determination.

206

207 **MAb RM20J binds to the  $\alpha$ 2 helix of gp120 and exploits a hole in the glycan shield of BG505 at**  
208 **position 289**

209 We solved a 2.3 Å crystal structure of unliganded RM20J Fab and a 3.9 Å cryoEM structure  
210 of RM20J Fab bound to the BG505 SOSIP Env trimer (Figs 3A and S3; Tables S4 and S5.). Together  
211 these structures revealed the RM20J Fab binds to an epitope on a single gp120 protomer with  
212 982 Å<sup>2</sup> of buried surface area (BSA). The CDR-H1 and CDR-H2 make contact with the C2 region of  
213 gp120 including residues N289 and T290 (Fig 3B). A glycan at position N289 would directly clash  
214 with both the CDR-H1 and CDR-H2 of RM20J (Fig 3B). CDR-L2 makes contact with the first N-  
215 acetyl glucosamine sugar of the N355 glycan (Fig 3C). Additional contacts are made to the  $\alpha$ 2  
216 helix of gp120 by RM20J CDR-H3 and CDR-L2 (Fig 3C). When compared to 10A, a previously  
217 characterized 241/289 glycan hole targeting NAb isolated from a BG505 SOSIP.664-immunized

218 rabbit (Bianchi et al., 2018; McCoy et al., 2016), RM20J binds to an epitope biased more towards  
219 289 and away from 241 in the 241/289 glycan hole, revealing subtle differences in the recognition  
220 of the epitope (Figs 3D and 3E). Despite binding to the BG505 SOSIP trimer with high affinity  
221 (Table S3), RM20J was not able to neutralize the autologous BG505.T332N pseudovirus (Fig 1C).  
222 Although the hypervariable region of V4 was not resolved in the trimer structure, it lies directly  
223 above the RM20J epitope and contains two additional glycans (N406 and N411) that may affect  
224 RM20J binding. Comparisons between the glycosylation profiles of the BG505 viral Env and the  
225 SOSIP.664 trimer revealed differences in the glycoforms present at positions N355, N406, and  
226 N411 (Cao et al., 2018; Struwe et al., 2018) with more complex glycans being found on the viral  
227 Env that could hinder the ability of RM20J to bind on the surface of the virus and, therefore,  
228 render it incapable of neutralization. Several of the mAbs isolated from rh1987, including the  
229 RM19A clonal family, bind to a similar epitope as RM20J (Fig 2D, Fig S2, Table S2) and either fail  
230 to neutralize the autologous BG505 virus or do so with weak potency (Fig 1C and D).

231

232 **MAb RM20F binds to a quaternary epitope at the gp120/gp41 interface that includes elements**  
233 **of the fusion peptide and the N88 glycan**

234 For a more detailed view of the mode of RM20F recognition, we solved a 2.2 Å crystal  
235 structure of unliganded RM20F Fab and a 4.3 Å cryoEM structure of RM20F Fab bound to BG505  
236 SOSIP trimer (Figs 4A and S3; Tables S4 and S5). RM20F recognizes an epitope spanning two gp41  
237 protomers and a single gp120 protomer that has 1126 Å<sup>2</sup> of BSA at the interface. The RM20F LC  
238 contributes 22% of the paratope surface area (250 Å<sup>2</sup>) and makes contact with the poorly  
239 conserved residues H85 (8.1% prevalence among global strains) and K229 (12.5% prevalence) in

240 the C1 and C2 regions of gp120 respectively (Fig 4B). The RM20F HC contributes the remaining  
241 78% of the paratope surface area (876 Å<sup>2</sup>) and uses its 20 residue CDR-H3 to wedge between the  
242 FP of the primary gp41 protomer and the HR2 helix of the adjacent gp41 protomer (Fig 4C).  
243 Additional contacts with the fusion peptide proximal region (FPPR) of the primary gp41 protomer  
244 are made by residues at the tip of CDR-H2 (Fig 4B). The N88 glycan accounts for 18% (198 Å<sup>2</sup>) of  
245 the epitope BSA and makes contact with the CDR-H2 and FR-H3 regions of RM20F (Fig 4B). The  
246 lack of connecting density, even at lower contour, between RM20F and the glycans at N611 and  
247 N637 suggests these glycans do not substantially contribute to the epitope. Epitope mapping  
248 using BG505.T332N mutant pseudoviruses showed that knocking out the N611 glycan (N611Q  
249 mutant) substantially enhanced neutralization by RM20F, while knocking out the N637 glycan  
250 (N637Q mutant) had no effect. (Fig 4D). Other virus mutants revealed that neutralization by  
251 RM20F was sensitive to various sequence changes within the epitope, particularly at residues  
252 H85 and E647 (84.3% prevalence) and N88 (N88 glycan knock out) (Fig 4D). The N88 glycan knock  
253 out and the H85A mutation (to a lesser extent) significantly reduced neutralization activity of the  
254 FP-targeting bNAb VRC34, but no effect on the CD4 binding site targeting bNAb VRC01 (Fig 4D).  
255 Introducing the 241 or 289 glycans (S241N and P291T, respectively) modestly reduced the  
256 neutralization activity of RM20F (Fig 4D). In comparison to the FP-targeting bNAbs VRC34 and  
257 ACS202, RM20F lacked neutralization breadth when tested against a panel that included multiple  
258 heterologous viruses (Fig S4) likely due to the dependency on poorly conserved residues.

259

260 **MAb RM20E1 binds to the fusion peptide and makes contact with two adjacent protomers**

261           We solved a 2.3 Å crystal structure of the unliganded RM20E1 Fab and 4.4 Å cryoEM  
262 structure of RM20E1 Fab bound to BG505 SOSIP trimer and Fab PGT122 (Figs 5A and S3; Tables  
263 S4 and S5). RM20E1 binds to an epitope composed of one gp120 and two gp41 protomers with  
264 1178 Å<sup>2</sup> of BSA. Residues 515 to 520 of the FP in the primary gp41 protomer are sandwiched  
265 between CDR-H3, CDR-L1, and CDR-L3 of RM20E1 (Fig 5B). CDR-H3 and FR-H1 make contact with  
266 HR2 in the adjacent gp41 protomer (Fig 5C). Additionally, the FR-H1 makes contact near the  
267 N611-glycan site in the adjacent gp41 protomer, but we observed no connecting density that  
268 could be attributed to the N611-glycan itself (Fig 5C). RM20E1 avoids the N88 glycan but does  
269 interact with residues in the C1 region of gp120, including H85, via its CDR-L1 (Fig 5B). Despite  
270 recognition of the conserved FP, RM20E1 did not neutralize the autologous BG505.T332N  
271 pseudovirus. The antibody did however potently neutralize the N611A glycan KO BG505  
272 pseudovirus (Fig 1C) suggesting the epitope is shielded by the N611 glycan. The epitopes of the  
273 FP-targeting bNAbs VRC34, ACS202, and DFPH-a.15 overlap to a large extent with the epitopes  
274 of RM20E1 and RM20F (Fig 5D), with DFPH-a.15 and VRC34 also neutralizing more potently in  
275 the absence of the N611 glycan (Kong et al., 2019; Kong et al., 2016; van Gils et al., 2016; Yuan et  
276 al., 2019). The RM20E1-bound FP conformation is similar to the FP conformation when bound by  
277 the bNAb VRC34 (Fig S5); however, the inability of RM20E1 to accommodate the N611 glycan  
278 likely results in the lack of neutralization of the wild-type virus.

279

## 280 **Discussion**

281           A major goal of HIV-1 vaccine research is to elicit bNAbs able to neutralize the large  
282 diversity of circulating HIV-1 strains in humans. However, how to achieve this goal remains a

283 critical problem. Native-like Env trimers are an important design platform for engineering  
284 immunogens for bNAb induction (de Taeye et al., 2015; Dubrovskaya et al., 2019; Escolano et al.,  
285 2019; Escolano et al., 2016; Kong et al., 2019; Sanders et al., 2013; Steichen et al., 2016; Torrents  
286 de la Pena et al., 2017; Yang et al., 2018). BG505 SOSIP trimers were able to induce responses in  
287 immunized RMs that potently neutralized the autologous Tier 2 virus (Pauthner et al., 2017;  
288 Sanders et al., 2015). When present at sufficient titers, those NAbs protected against BG505-SHIV  
289 challenge (Pauthner et al., 2019). Evaluating SOSIP trimers in RMs can yield valuable information  
290 because of the close genetic relationship between RMs and humans. Here, we isolated mAbs  
291 from two BG505 SOSIP.664 trimer-immunized RMs to better understand how the immune  
292 system recognizes the trimers and the epitopes associated with the potent, but limited, HIV-1  
293 Tier 2 neutralization.

294 By mapping the epitopes of all of the mAbs isolated from the immunized RMs, rather than  
295 focusing only on NAbs, we were able to identify several non-neutralizing and potentially  
296 immunodominant epitopes that would ideally be eliminated in future immunization studies. As  
297 shown previously with mAbs from rabbits immunized with BG505 SOSIP.664 trimers (McCoy et  
298 al., 2016), the lack of glycans at positions 241 and 289 in BG505 creates a large glycan hole which  
299 is targeted by mAbs from both RMs. The mAbs isolated from RMs that target the 241/289 glycan  
300 hole are more biased towards the 289-site compared to the previously characterized rabbit  
301 mAbs. This difference may be attributed to the underlying differences in BCR repertoires  
302 between the two animal models. In addition to the lack of glycans due to missing sequons that  
303 encode for glycosylation, the recombinant BG505 SOSIP.664 trimer may also contain missing  
304 glycans even when the correct sequon is present as previously observed by mass spectrometry

305 studies of glycopeptides (Cao et al., 2017; Cao et al., 2018). Our study identified gp120/gp41  
306 interface antibodies whose neutralization was enhanced in the absence of the N611 glycan,  
307 suggesting that the BG505 SOSIP.664 trimer may have sub-stoichiometric glycan occupancy in  
308 gp41 at this position, creating an unexpected but immunogenic glycan hole. The elicitation of FP  
309 targeting mAbs in RMs with the BG505 SOSIP.664 trimer provides evidence that the FP bNAb  
310 epitope is accessible and immunogenic on soluble Env trimer immunogens. Recent studies in  
311 mice, guinea pigs and RMs using synthetically produced HIV fusion peptides covalently attached  
312 to carrier proteins as priming immunogens followed by boosts with soluble Env trimer  
313 immunogens have also elicited FP specific antibodies including some mAbs with neutralization  
314 breadth (Cheng et al., 2019; Kong et al., 2019; Xu et al., 2018). However, the majority of the  
315 animals immunized in these studies do not develop neutralization breadth and instead develop  
316 potent neutralization against the BG505 pseudovirus with the N611 glycan KO (Cheng et al., 2019;  
317 Kong et al., 2019; Xu et al., 2018). Given the consistency across studies and animal models in  
318 eliciting potent NABs that target the FP epitope and require the absence of the N611 glycan,  
319 investing in strategies to quantify and enhance the N611 glycan occupancy in soluble Env trimer  
320 immunogens, particularly for boost immunogens, may improve the neutralization breadth  
321 elicited by FP-targeting immunization protocols.

322         The sorting probe used to isolate BG505 Env-specific B-cells was a C-terminally  
323 biotinylated BG505 SOSIP.664 trimer bound to a fluorescent streptavidin tetramer. Steric  
324 constraints between the base of the trimer and the streptavidin tetramer likely resulted in a  
325 lower recovery of base epitope-specific B-cells. Despite this potential selection bias, 55% of the  
326 mAbs isolated from the two immunized RMs bound to the base of the BG505 SOSIP.664 trimer,



327 indicating the base of the soluble trimer is the major target for antibody responses during  
328 immunization. To reduce the immunogenicity of this epitope, glycans can be introduced to shield  
329 this site or the native-like trimers could be constructed onto scaffolds or particles (Brouwer et  
330 al., 2019; Georgiev et al., 2018; Kulp et al., 2017; Ringe et al., 2019).

331 We were unable to construct individual germline BCR databases from RMs rh1987 and  
332 rh2011 to precisely determine the SHM and gene/alleles usage as samples of naïve PBMC  
333 samples were no longer available. Instead, we constructed a germline database containing BCR  
334 gene/alleles from multiple Indian origin RMs that allowed us to measure SHM levels in the mAbs  
335 we isolated from RMs. The new database provides web-based access  
336 (<http://ward.scripps.edu/gld/>) to a curated and highly annotated general resource for examining  
337 BCR gene/alleles from Indian origin RMs. Previous estimates of average SHM rates in mAb  
338 sequences from Env-immunized RMs were 8.9% and 6.1% for the HC and LC, respectively (Wang  
339 et al., 2017). These apparently high levels of SHM following repeated immunization with the  
340 exact same soluble Env immunogens were likely due to missing germline gene/alleles from the  
341 database used to calculate SHM. Using the germline database reported in this study, we were  
342 able to assign vaccine-elicited antibody sequences to specific germline genes/alleles and  
343 determine levels of SHM much more accurately. The average levels of SHM reported in this study  
344 (6.3% for HC and 4.2% for LC) are comparable to the average levels of SHM reported in similar  
345 immunization studies where per animal germline BCR databases were inferred using IgDiscover  
346 (Martinez-Murillo et al., 2017; Phad et al., 2020). Our germline database provides a resource for  
347 assigning germline genes/alleles and accurately calculating rates of SHM when inferring  
348 individual germline databases for each animal is logistically impractical.

349 In conclusion, in this study, neutralizing and non-neutralizing mAbs with distinctive  
350 epitopes were isolated and characterized in BG505 SOSIP.664-immunized RMs. We  
351 demonstrated that a polyclonal response was elicited in two different RMs that target the BG505  
352 SOSIP.664 trimer in highly similar ways. While rabbit antibody responses are dominated by the  
353 base and 241-glycan hole epitopes, the RM mAbs target more diverse epitopes with mAbs also  
354 targeting the FP and gp120/gp41 interface. The mAbs characterized here also provide a valuable  
355 resource for epitope mapping and comparison to a wide array of BG505-based immunization  
356 experiments, including the recently initiated BG505 SOSIP.664 human clinical trial  
357 (NCT03699241). Finally, the FP-targeting mAbs in particular provide a structure-guided  
358 opportunity to modify BG505 SOSIP and other trimers to focus the antibody response on the FP-  
359 region, with the goal of eliciting bNAb-like antibodies.

360

## 361 **Methods**

### 362 **Immunizations of rhesus macaques**

363 Immunization samples used in this study were obtained from previously immunized RMs  
364 described in Sanders et al. 2015 (Sanders et al., 2015). Briefly, RMs were immunized  
365 intramuscularly (i.m.) with 100 µg of BG505 SOSIP.664 trimer formulated in 75 units of  
366 ISCOMATRIX given at week 0, 4, 12, 24, 38 and 52. All immunizations and blood samplings were  
367 performed at the Wisconsin National Primate Research Center as described previously (Sanders  
368 et al., 2015).

### 369 **Rhesus macaque naïve B-cell repertoire sequencing**

370 Frozen PBMCs from five naïve Indian origin RMs were obtained from Yerkes National Primate  
371 Research Center (IACUC approval YER2001036). The cells were rapidly thawed in a 37°C water  
372 bath and immediately diluted into 10 mL of pre-warmed RPMI media with 10% (v/v) heat-  
373 inactivated fetal bovine serum (FBS). Cells were pelleted at 400xg for 7 minutes and resuspended  
374 in 0.5 mL FACS buffer (PBS + 1% (v/v) FBS) and stained on ice for 1 hr with the panel of fluorescent  
375 antibodies against IgM ([clone G20-127] BD), CD4 ([clone OKT-4] BioLegend), CD3 ([clone SP34-  
376 2] BD), IgG ([clone G18-145] BD), CD20 ([clone 2H7] BioLegend), CD8 ([clone RPA-T8] BioLegend),  
377 CD14 ([clone M5E2] BD), CD16 ([clone eBioCB16] ThermoFisher) and an eFluor780 viability  
378 marker (ThermoFisher). A MoFlo Astrios cell sorter (Beckman Coulter), with gating for live  
379 IgM<sup>+</sup>/CD20<sup>+</sup>/CD3<sup>-</sup>/CD4<sup>-</sup>/CD8<sup>-</sup>/CD14<sup>-</sup>/CD16<sup>-</sup> cells, was used to isolate cells that were then pelleted  
380 at 600xg for 10 min, resuspended in RLT+BME buffer (Qiagen), snap frozen in a dry ice ethanol  
381 bath and stored at -80°C. RNA extraction was performed using RNeasy Protect Mini kit (Qiagen)  
382 following the manufacturer's instructions. The 5' rapid amplification of cDNA ends (5'RACE) with  
383 template switching method was used to obtain cDNA with unique molecular identifiers (UMIs)  
384 using a protocol modified from Turchaninova *et al.* (Turchaninova et al., 2016). Briefly, 300 ng of  
385 RNA was used in a 5'RACE cDNA synthesis reaction. The first-strand cDNA synthesis was  
386 performed at 42°C for 1 hr using the RM IgM outer reverse primer (5'-  
387 GTGATGGAGTCGGGAAGGAAG-3'), a template switch adaptor with incorporated UMIs (5'-  
388 AAGCAGUGGTAUCAACGCAGAGUNNNNUNNNNUNNNNUCTTrGrGrGrG-3'), and SMARTScribe  
389 Reverse Transcriptase (Clontech). Residual template switch adaptor was removed by incubation  
390 with 5 U of uracil DNA glycosylase (New England BioLabs) for 40 min at 37°C. The resulting cDNA  
391 was purified using the MinElute PCR Purification Kit (Qiagen) following the manufacturer's

392 instructions. PCR amplification was performed using the Q5<sup>®</sup> High-Fidelity DNA Polymerase (New  
393 England BioLabs), the forward primer (5'-NNNNAAGCAGTGGTATCAACGCA-3'), and the RM IgM  
394 inner reverse primer (5'-NNNNNAGGGGGAAAAGGGTTG-3'). Illumina adaptors were added using  
395 the NEBNext<sup>®</sup> Ultra<sup>™</sup> II DNA Library Prep Kit (New England BioLabs) following the manufacturer's  
396 instructions. Libraries were sequenced on an Illumina MiSeq using the Illumina v3, (2x 300 bp)  
397 sequencing kit.

### 398 **Indian origin RM germline BCR database**

399 Gene/alleles published by Vigdorovich *et al.* (Vigdorovich et al., 2016) were aligned to the  
400 Mmul\_8.0.1 Indian origin RM genome assembly using BLAST (Johnson et al., 2008; Zimin et al.,  
401 2014). Sequences that were not identical to the reference genome were eliminated. Additional  
402 full-length genes/alleles from available Indian origin RM genomic DNA sequencing datasets  
403 (Cirelli et al., 2019; Ramesh et al., 2017) were added to the database. Duplicates and sequences  
404 containing ambiguous bases were removed. The resulting initial Indian origin RM germline BCR  
405 database (Table S1) was used for running IgDiscover on additional NGS datasets that were  
406 obtained during this study as described above, downloaded from the NCBI SRA (Corcoran et al.,  
407 2016; Guo et al., 2015), or obtained directly from the study authors (Vigdorovich et al., 2016).  
408 Paired sequence reads were aligned and filtered for length and quality using VDJSerVer (Christley  
409 et al., 2018). Novel germline BCR gene/alleles were inferred using IgDiscover v0.11 with the  
410 germline\_filter parameters "unique\_cdr3s" and "unique\_js" set to 10 and 4 respectively to  
411 reduce the rate of false positives (Corcoran et al., 2016). Inferred genes/alleles were kept if they  
412 were detected in more than one animal or if they were identical to RM genes/alleles that were  
413 previously deposited in NCBI. The resulting germline BCR database (available at

414 <http://ward.scripps.edu/gld/>) was converted into a custom IgBLAST database and subsequently  
415 used to analyze the BG505-specific mAb sequences (Ye et al., 2013).

#### 416 **Env sequence analysis**

417 Prevalence of specific amino acids or potential N-linked glycosylation sites (PNGS) were  
418 calculated using HIVAnchor (<https://github.com/chazbot72/anchor>). Pairwise alignments  
419 between the HxB2 Env reference sequence (K03455) and the LANL 2018 Group M super filtered  
420 web alignment was performed using Clustal Omega (Sievers and Higgins, 2018). The results were  
421 parsed into a database keyed on positions relative to the reference, with gaps notated as sub  
422 positions following the last identical residue. The database was subsequently interrogated for  
423 conservation of amino acids or PNGS at specific positions.

#### 424 **Env protein production**

425 BG505 SOSIP.664, BG505 SOSIP.664-D7324 tag, BG505 SOSIP.664-AviTag, BG505 SOSIP.v4.1, and  
426 BG505 SOSIP.v5.2 were expressed in HEK293F cells and purified with either PGT145 or 2G12  
427 affinity chromatograph followed by size exclusion chromatography (SEC) using a HiLoad® 16/600  
428 Superdex® pg200 (GE Healthcare) as described previously (de Taeye et al., 2015; Sanders et al.,  
429 2013; Torrents de la Pena et al., 2017). Monomeric gp120 proteins (AviTag or D7324 tagged)  
430 were purified using a *Galanthus nivalis* lectin (Vector Labs) column. The Avi-tagged proteins were  
431 biotinylated using the BirA enzyme (Avidity) according to the manufacturer's protocol. The  
432 resulting biotinylated proteins are referred to using the descriptor AviB.

#### 433 **Monoclonal antibody isolation**

434 BG505 SOSIP.664-specific IgG<sup>+</sup> memory B-cells from isolated PBMCs from RMs rh1987 and  
435 rh2011 were single cell sorted in lysis buffer in order to amplify the antigen-specific mAbs, as

436 previously described (Sok et al., 2014). PBMCs were stained with primary fluorophore-conjugated  
437 antibodies to human CD3, CD8, CD14, CD20, IgG and IgM (BD Pharmigen). For staining with Env  
438 proteins, 50 nM of BG505 SOSIP.664-AviB, BG505 SOSIP.664 7C3-AviB or gp120-AviB were  
439 coupled in equimolar ratios to Streptavidin-PE, Streptavidin-FITC or Streptavidin-APC (Life  
440 Technologies), respectively. Cells were stained for 1 hr at 4°C in PBS supplemented with 1 mM  
441 EDTA and 1% FBS. In the gating strategy, we first excluded unwanted cell populations (CD3<sup>-</sup>/CD8<sup>-</sup>  
442 /CD14<sup>-</sup>) followed by selection of HIV Env-specific (positive for any of the 3 probes) memory B-  
443 cells (CD20<sup>+</sup>/IgG<sup>+</sup>/IgM<sup>-</sup>/HIV<sup>+</sup>). Cells of interest were single-cell sorted using a BD FACSAria III  
444 machine, into 96-well plates containing lysis buffer, and immediately stored at -80°C. One round  
445 of reverse-transcription and two rounds of nested PCR were performed to amplify the antibody  
446 V(D)J genes as previously described by Tiller *et al.*<sup>15</sup>. The PCR products containing the variable  
447 regions of the heavy chain or light chain, kappa or lambda were cloned into human IgG expression  
448 vectors to produce mAbs as described previously (Sok et al., 2014). Fab expression vectors were  
449 made by introducing two stop codons following residue D234 (Kabat numbering (Kabat, 1991))  
450 in the IgG heavy chain vectors using the QuikChange<sup>®</sup> Lightning Site-Directed Mutagenesis kit  
451 (Agilent). Sequences were verified by Sanger sequencing (Genewiz).

#### 452 **Monoclonal antibody and Fab production**

453 MAbs and Fabs were expressed in HEK293F cells and purified using affinity chromatography.  
454 Briefly, HEK293F cells (Invitrogen) were co-transfected with heavy and light chain plasmids (1:1  
455 ratio) using PEI<sub>max</sub>. Transfections were performed according to the manufacturer's protocol.  
456 Supernatants were harvested 4-6 days following transfection and passed through a 0.45 µm filter.  
457 MAbs were purified using Protein A/G (ThermoFisher) or MAbSelect<sup>™</sup> (GE Healthcare) affinity

458 chromatography. Fabs were purified using CaptureSelect™ CH1-XL (ThermoFisher) affinity  
459 chromatography.

#### 460 **D7324-capture ELISA for monomeric and trimeric BG505 Env proteins**

461 Binding ELISAs were conducted as described previously (Sanders et al., 2013; van Gils et al., 2016).

#### 462 **TZM-bl cell-based neutralization assays**

463 Neutralization assays using the autologous BG505.T332N virus and mutants, and the  
464 heterologous SF162 virus, were carried out as described previously (Derking et al., 2015).

465 Nonlinear regression curves were determined and 50% inhibitory concentration (IC<sub>50</sub>) values  
466 were calculated using a sigmoid function in Graphpad Prism v7.03.

#### 467 **Bio-Layer Interferometry (BLI)**

468 An Octet RED instrument (FortéBio) was used to determine the kinetic parameters of the  
469 antibody–antigen interactions by Biolayer Interferometry. Monoclonal Fabs were loaded onto  
470 anti-human Fab-CH1 (FAB2G) biosensors (FortéBio) at a concentration of 10 µg/mL in kinetics  
471 buffer (PBS, pH 7.4, 0.01% [w/v] BSA, and 0.002% [v/v] Tween 20) until a response of 1 nanometer  
472 shift was reached. Loaded biosensors were dipped into kinetics buffer for 1 min to acquire a  
473 baseline and then moved to wells containing a series of 2-fold dilutions of BG505 SOSIP.v5.2 in  
474 kinetics buffer, starting at a 4000 nM. The trimers were allowed to associate for 180 secs before  
475 the biosensor were move back to the wells containing kinetics buffer where the baseline was  
476 acquired. Disassociation of the trimers from the Fab-loaded biosensors was recorded for 300  
477 secs. All BLI experiments were conducted at 37°C. Kinetic parameters were calculated using the  
478 Octet System Data Analysis v9.0 (FortéBio).

#### 479 **Negative Stain Electron Microscopy**

480 BG505 SOSIP/Fab complexes were made by mixing 10-15  $\mu\text{g}$  SOSIP with a 3 to 6-fold per protomer  
481 molar excess for monoclonal Fabs or 500  $\mu\text{g}$  polyclonal Fabs and allowed to incubate for 18 to 24  
482 hrs at room temperature (RT). Complex samples were either diluted to 0.02 mg/mL and applied  
483 to glow discharged negative stain grids or they were SEC purified using a Superose<sup>TM</sup> 6 Increase  
484 10/300 GL (GE Healthcare) column to remove excess Fab prior to EM grid preparation. Fractions  
485 containing the SOSIP/Fab complexes were pooled and concentrated using 10 kDa Amicon<sup>®</sup> spin  
486 concentrators (Millipore). Samples were diluted to 0.03 mg/mL in TBS (0.05 M Tris pH 7.4, 0.15  
487 M NaCl) and adsorbed onto glow discharged carbon-coated Cu400 EM grids (Electron Microscopy  
488 Sciences) and blotted after 10 seconds. The grids were then stained with 3  $\mu\text{L}$  of 2% (w/v) uranyl  
489 formate, immediately blotted, and stained again for 45 secs followed by a final blot. Image  
490 collection and data processing was performed as described previously on either an FEI Tecnai T12  
491 microscope (2.05  $\text{\AA}$ /pixel; 52,000 $\times$  magnification) or FEI Talos microscope (1.98  $\text{\AA}$ /pixel; 72,000 $\times$   
492 magnification) with an electron dose of  $\sim 25$  electrons/ $\text{\AA}^2$  using Legimon (Pugach et al., 2015;  
493 Suloway et al., 2005). 2D classification, 3D sorting and 3D refinement conducted using Relion v3.0  
494 (Zivanov et al., 2018). EM density maps were visualized using UCSF Chimera and segmented using  
495 Segger (Pettersen et al., 2004; Pintilie et al., 2010).

#### 496 **X-ray Crystallography Data Collection and Processing**

497 All crystals were grown using sitting drop vapor diffusion. The RM20F Fab was crystallized from  
498 a solution containing 10 mg/mL protein in TBS with a well solution containing 0.1M MES, pH 5.0  
499 and 2M ammonium sulfate. The crystals were cryoprotected by soaking in a well solution  
500 supplemented with 30% ethylene glycol. The RM20J Fab was crystallized from a solution  
501 containing 10 mg/mL protein in TBS with a well solution containing 0.1M MES, pH 6.0, 5%



502 PEG3000 and 40% PEG400, with no cryoprotectant supplemented. The RM20E1 Fab was  
503 crystallized from a solution containing 6.3 mg/mL protein in TBS with a well solution containing  
504 0.1M glycine, pH 10.5, 1.2M NaH<sub>2</sub>PO<sub>4</sub>, 0.8M Na<sub>2</sub>HPO<sub>4</sub>, and 0.2M Li<sub>2</sub>SO<sub>4</sub>, with 15% ethylene glycol  
505 supplemented as cryoprotectant. All crystals were grown at 298 K. Diffraction data for RM20F  
506 and RM20E1 were collected at the Stanford Synchrotron Radiation Lightsource (SSRL) beamline  
507 BL12-2, and that for RM20J collected at the Advanced Photon Source (APS) beamline 23ID-B.  
508 Data collection and processing statistics are detailed in Table S5. Data sets were indexed,  
509 integrated, and scaled using the HKL-2000 package (Otwinowski and Minor, 1997). The structures  
510 were solved by molecular replacement using PHASER (McCoy et al., 2007) with a homology model  
511 (SWISS-MODEL; (Arnold et al., 2006; Biasini et al., 2014; Bordoli et al., 2009)) as a search model  
512 and further refined using phenix.refine (Adams et al., 2010) combined with manual building  
513 cycles in Coot (Emsley et al., 2010).

#### 514 **Cryo Electron Microscopy Sample Preparation**

515 RM20J complex: 500 µg BG505 SOSIP.v5.2 was mixed with 656 µg RM20J Fab and incubated at  
516 RT overnight. The complex was SEC purified using a HiLoad® 16/600 Superdex® pg200 (GE  
517 Healthcare) column in TBS. Fractions containing the complex were concentrated to 6.1 mg/mL  
518 using a 10 kDa Amicon® spin concentrator (Millipore). 3.5 µL of the complex was mixed with 0.57  
519 µL of 0.04 mM lauryl maltose neopentyl glycol (LMNG) and applied to a C-Flat grid (CF-2/1-4C,  
520 Protochips, Inc.), which had been plasma-cleaned for 5 seconds using a mixture of N<sub>2</sub>/O<sub>2</sub> (Gatan  
521 Solarus 950 Plasma system). The grid was blotted and plunged into liquid ethane using a Vitrobot  
522 Mark IV (ThermoFisher).

523 RM20F complex: 500 µg BG505 SOSIP.v4.1 was mixed with approximately 1,000 µg RM20F Fab  
524 and incubated at RT overnight. The complex was SEC purified using a Superose™ 6 Increase  
525 10/300 GL (GE Healthcare) column in TBS. Fractions containing the complex were concentrated  
526 to 6 mg/mL using a 10 kDa Amicon® spin concentrator (Millipore). 3 µL of the complex was mixed  
527 with 1 µL of a n-Dodecyl-β-D-Maltopyranoside (DDM) solution to a final DDM concentration of  
528 0.06 mM and applied to a C-Flat grid (CF-2/2-4C, Protochips, Inc.), which had been plasma-  
529 cleaned for 5 seconds using a mixture of N<sub>2</sub>/O<sub>2</sub> (Gatan Solarus 950 Plasma system). The grid was  
530 blotted and plunged into liquid Ethane using a Vitrobot Mark IV (ThermoFisher).

531 RM20E1 complex: 355 µg BG505 SOSIP.v5.2 was mixed with 484 µg RM20E1 Fab and 484 µg  
532 PGT122 Fab and incubated at RT overnight. The complex was SEC purified using a HiLoad® 16/600  
533 Superdex® pg200 (GE Healthcare) column in TBS. Fractions containing the complex were  
534 concentrated to 4 mg/mL using a 10 kDa Amicon® spin concentrator (Millipore). 3 µL of the  
535 complex was mixed with 1 µL of a n-Dodecyl-β-D-Maltopyranoside (DDM) solution to a final DDM  
536 concentration of 0.06 mM and applied to a grid (Quantifoil R 1.2/1.3, 400), which had been  
537 plasma-cleaned for 5 seconds using a mixture of N<sub>2</sub>/O<sub>2</sub> (Gatan Solarus 950 Plasma system). The  
538 grid was blotted and plunged into liquid Ethane using a Vitrobot Mark IV (ThermoFisher).

### 539 **Cryo Electron Microscopy Data Collection and Processing**

540 Samples were imaged on either FEI Titan Krios electron microscope (ThermoFisher) operating at  
541 300 keV (RM20F dataset) or a FEI Talos Arctica electron microscope (ThermoFisher) operating at  
542 200 keV (RM20J and RM20E1 datasets). Both microscopes were equipped with Gatan K2 Summit  
543 direct electron detectors operating in counting mode. Automated data collection was performed  
544 using the Legimon software suite (Suloway et al., 2005). Micrograph movie frames were aligned

545 and dose-weighted using MotionCor2 (Zheng et al., 2017), and CTF models were determined  
546 using Gctf (Zhang, 2016). Particle picking, 2D classification, Ab-initio reconstruction, and 3D  
547 refinement were conducted using cryoSPARCv2 (Punjani et al., 2017). Data collection and  
548 processing parameters are reported in Table S4.

549 Initial molecular models of the BG505 SOSIP trimer/Fab complexes were built by docking the Env  
550 portion of PDB: 5V8M (Lee et al., 2017) into the EM density maps along with the relevant Fab  
551 crystal structures (PDB: 4JY5 was used for PGT122 (Julien et al., 2013b)) using UCSF Chimera  
552 (Pettersen et al., 2004). The Fab constant regions were removed due to flexibility in the elbow  
553 region as commonly found in Fab structures (Bailey et al., 2018), the appropriate stabilizing  
554 mutations (v4.1 or v5.2) were introduced into the Env sequence, and N-linked glycans were  
555 added using Coot (van Beusekom et al., 2019). The models were iteratively refined into the EM  
556 density maps using RosettaRelax and Coot (Casanal et al., 2019; DiMaio et al., 2009; Emsley et  
557 al., 2010; Frenz et al., 2018; van Beusekom et al., 2019). Glycan structures were validated using  
558 Privateer (Agirre et al., 2015). Overall structures were evaluated using EMRinger (Barad et al.,  
559 2015) and MolProbity (Williams et al., 2018). Protein interface calculations were performed using  
560 jsPISA (Krissinel, 2015). Final model statistics are summarized in Table S4.

## 561 **Statistical analysis**

562 Statistical models inherent to Relion 3.0 (Zivanov et al., 2018) and cryoSPARC (Punjani et al.,  
563 2017) were employed in image analysis to derive 2D classes and 3D models. All ELISA and  
564 neutralization assays were conducted with at least duplicate measurements.

## 565 **Data and Software Availability**

566 The accession numbers for Env-specific BCR sequences are DDBJ/ENA/GenBank: MT002976-  
567 MT002992 and MT008262-MT008328. RM IgM BCR sequences are available under BioProject ID:  
568 PRJNA604386. Atomic coordinates and structure factors of the reported crystal structure have  
569 been deposited in the Protein Data Bank (PDB: 6VOS, 6VOR). Cryo-EM reconstructions have been  
570 deposited in the Electron Microscopy Data Bank (EMDB: EMD-21246, EMD-21257, EMD-21232),  
571 and in the Protein Data Bank (PDB: 6VNO, 6VO1, 6VLR). The accession numbers for the negative  
572 stain 3D EM reconstructions are Electron Microscopy DataBank: EMD-21053, EMD-21055, EMD-  
573 21056, EMD-21057, EMD-21058, EMD-21059, EMD-21061, EMD-21062, EMD-21064, EMD-  
574 21065, EMD-21066, EMD-21075, EMD-21076, EMD-21077, EMD-21078, EMD-21079, EMD-  
575 21080, EMD-21081, EMD-21082, EMD-21083, EMD-21084, EMD-21085, EMD-21086, EMD-  
576 21087, EMD-21088, EMD-21089, EMD-21090, EMD-21091, EMD-21092, EMD-21093, EMD-  
577 21272, EMD-21273, EMD-21274, EMD-21275, EMD-21276, EMD-21277, EMD-21278.

578

## 579 **Figure Legends**

580 **Figure 1.** MAb isolation and characterization from BG505 SOSIP.664 trimer-immunized RMs. (A)  
581 Simplified immunization scheme adapted from Sanders et al. 2015 (Sanders et al., 2015). Black  
582 arrows indicate i.m. immunizations with 100 µg of BG505 SOSIP.664 with 75 units of ISCOMATRIX  
583 adjuvant. Red arrows indicate blood draws. (B) Heavy and light chain genetic characteristics for  
584 mAbs isolated from rh1987 and rh2011. (C) TZM-bl neutralization of BG505.T332N,  
585 BG505.T332N.N611A, and SF162 pseudoviruses for mAbs isolated from RM rh1987. (D) TZM-bl  
586 neutralization of BG505.T332N, BG505.T332N.N611A, and SF162 pseudoviruses for mAbs  
587 isolated from RM rh2011. Assay limit of detection was at an IC<sub>50</sub> of 50 µg/mL.

588 **Figure 2.** Epitope mapping by negative stain electron microscopy. (A) Representative base-  
589 targeting mAbs for animals rh1987 and rh2011. (B) Overlapping gp120/gp41 interface epitope  
590 targeted by mAbs from both animals. (C) Overlapping FP epitope targeted by mAbs from both  
591 animals. (D) Overlapping N289-glycan hole epitope targeted by mAbs from both animals. (E)  
592 EMPDEM analysis for wk28 IgG from rh2011 and rh1987. All structural figures were generated with  
593 UCSF Chimera (Pettersen et al., 2004). EM density maps were segmented with the Segger  
594 extension in UCSF Chimera (Pettersen et al., 2004; Pintilie et al., 2010).

595 **Figure 3.** RM20J binds to the N289 glycan hole region of BG505 SOSIP.v5.2 (A) Segmented 3.9 Å  
596 cryoEM reconstruction of RM20J Fab (pink) in complex with BG505 SOSIP.v5.2 (gp120, dark blue;  
597 gp41, light blue). (B) and (C) Zoomed-in views of the epitope/paratope interaction between  
598 gp120 (blue, ribbon diagram) and RM20J Fab (surface representation). (D) and (E) Comparison of  
599 the RM20J epitope with that of the BG505 SOSIP.664 elicited rabbit neutralizing NAb 10A (PDB:  
600 6DID) (Bianchi et al., 2018; McCoy et al., 2016).

601 **Figure 4.** RM20F binds to a quaternary epitope at the gp120/gp41 interface of BG505 SOSIP.v4.1.  
602 (A) Segmented 4.3 Å cryoEM reconstruction of RM20F Fab (orange) in complex with BG505 SOSIP  
603 (gp120, dark blue; gp41, light blue). (B) and (C) Zoomed-in views of the epitope/paratope  
604 interaction between BG505 SOSIP (gp120, dark blue; gp41s, light blue and light green; ribbon  
605 diagram) and RM20F Fab (surface representation). (D) Neutralization data for BG505 mutant  
606 pseudoviruses against VRC01, RM20F, and VRC34.

607 **Figure 5.** RM20E1 binds to the fusion peptide of BG505 SOSIP.v5.2. (A) Segmented 4.2 Å cryoEM  
608 reconstruction of RM20E1 Fab (yellow) and PGT122 Fab (light green) in complex with BG505  
609 SOSIP (gp120, dark blue; gp41, light blue). (B) and (C) Zoomed-in views of the epitope/paratope

610 interaction between BG505 SOSIP (gp120, dark blue; gp41s, light blue and light green; ribbon  
611 diagram) and RM20E1 Fab (surface representation). (D) Comparison of RM20E1 and RM20F  
612 epitopes to those of FP targeting bNAbs VRC34, ACS202, and DFPH-a.15 (Kong et al., 2019; Kong  
613 et al., 2016; van Gils et al., 2016; Yuan et al., 2019).

614 **Table S1.** Initial germline BCR database used in IgDiscover

615

## 616 **Acknowledgements**

617 We thank Jean-Christophe Ducom, Hannah Turner, and Bill Anderson for assistance with  
618 computational resources, microscope management, and data collection. We thank Alan Saluk,  
619 Brian Seegers, Steven Head, Jessica Ledesma, Curt Wittenberg, and Nitya Bhaskaran for  
620 assistance with naïve B-cell sorting and NGS sequencing. This work was supported by the HIV  
621 Vaccine Research and Design (HIVRAD) program (P01 AI110657) (A.B.W., R.W.S, J.P.M., and  
622 I.A.W.), NIH CHAVI-ID (UM1 AI100663) and CHAVD (UM1 AI44462) awards (A.B.W., I.A.W. and  
623 D.R.B.), NIH R01 AI13082 (J.P.M.), the International AIDS Vaccine Initiative Neutralizing Antibody  
624 Center, the Bill and Melinda Gates Foundation CAVD (OPP1115782, OPP1132237, OPP1084519,  
625 OPP119635), and the European Union's Horizon 2020 research and innovation program under  
626 grant agreement no. 681137 (R.W.S.). C.A.C. is supported by the NIH F31 Ruth L. Kirschstein  
627 Predoctoral Award AI131873 and by the Achievement Rewards for College Scientists Foundation.  
628 R.W.S. is a recipient of a Vici fellowship from the Netherlands Organization for Scientific Research  
629 (NWO). G.O. and M.J.v.G. are supported by amfAR Mathilde Krim Fellowships in Basic Biomedical  
630 Research grant numbers 109718-63-RKNT and 109514-61-RKVA, respectively. J.v.S. is a recipient  
631 of a 2017 AMC Ph.D. Scholarship. Computational analyses of EM data were performed using

632 shared instrumentation funded by NIH grant S10OD021634. Naïve B-cell sorting and NGS  
633 sequencing was conducted as part of the Technologies Across Scale graduate course with support  
634 from Skaggs Graduate School of Chemical and Biological Sciences at Scripps Research. Use of the  
635 Stanford Synchrotron Radiation Lightsource, SLAC National Accelerator Laboratory, is supported  
636 by the U.S. Department of Energy, Office of Science, Office of Basic Energy Sciences under  
637 Contract No. DE-AC02-76SF00515. The SSRL Structural Molecular Biology Program is supported  
638 by the DOE Office of Biological and Environmental Research, and by the National Institutes of  
639 Health, National Institute of General Medical Sciences (including P41GM103393). The contents  
640 of this publication are solely the responsibility of the authors and do not necessarily represent  
641 the official views of NIGMS, NIAID, or NIH.

642

## 643 **References**

- 644 Adams, P.D., Afonine, P.V., Bunkoczi, G., Chen, V.B., Davis, I.W., Echols, N., Headd, J.J., Hung,  
645 L.W., Kapral, G.J., Grosse-Kunstleve, R.W., *et al.* (2010). PHENIX: a comprehensive Python-based  
646 system for macromolecular structure solution. *Acta crystallographica Section D, Biological*  
647 *crystallography* 66, 213-221.
- 648 Agirre, J., Iglesias-Fernandez, J., Rovira, C., Davies, G.J., Wilson, K.S., and Cowtan, K.D. (2015).  
649 Privateer: software for the conformational validation of carbohydrate structures. *Nature*  
650 *structural & molecular biology* 22, 833-834.
- 651 Arnold, K., Bordoli, L., Kopp, J., and Schwede, T. (2006). The SWISS-MODEL workspace: a web-  
652 based environment for protein structure homology modelling. *Bioinformatics* 22, 195-201.
- 653 Bailey, L.J., Sheehy, K.M., Dominik, P.K., Liang, W.G., Rui, H., Clark, M., Jaskolowski, M., Kim, Y.,  
654 Deneka, D., Tang, W.J., *et al.* (2018). Locking the Elbow: Improved Antibody Fab Fragments as  
655 Chaperones for Structure Determination. *Journal of molecular biology* 430, 337-347.
- 656 Barad, B.A., Echols, N., Wang, R.Y., Cheng, Y., DiMaio, F., Adams, P.D., and Fraser, J.S. (2015).  
657 EMRinger: side chain-directed model and map validation for 3D cryo-electron microscopy.  
658 *Nature methods* 12, 943-946.
- 659 Bianchi, M., Turner, H.L., Nogal, B., Cottrell, C.A., Oyen, D., Pauthner, M., Bastidas, R., Nedellec,  
660 R., McCoy, L.E., Wilson, I.A., *et al.* (2018). Electron-Microscopy-Based Epitope Mapping Defines  
661 Specificities of Polyclonal Antibodies Elicited during HIV-1 BG505 Envelope Trimer  
662 Immunization. *Immunity* 49, 288-300 e288.

663 Biasini, M., Bienert, S., Waterhouse, A., Arnold, K., Studer, G., Schmidt, T., Kiefer, F., Gallo  
664 Cassarino, T., Bertoni, M., Bordoli, L., *et al.* (2014). SWISS-MODEL: modelling protein tertiary  
665 and quaternary structure using evolutionary information. *Nucleic Acids Res* *42*, W252-258.  
666 Bordoli, L., Kiefer, F., Arnold, K., Benkert, P., Battey, J., and Schwede, T. (2009). Protein  
667 structure homology modeling using SWISS-MODEL workspace. *Nature protocols* *4*, 1-13.  
668 Brouwer, P.J.M., Antanasijevic, A., Berndsen, Z., Yasmeen, A., Fiala, B., Bijl, T.P.L., Bontjer, I.,  
669 Bale, J.B., Sheffler, W., Allen, J.D., *et al.* (2019). Enhancing and shaping the immunogenicity of  
670 native-like HIV-1 envelope trimers with a two-component protein nanoparticle. *Nat Commun*  
671 *10*, 4272.  
672 Burton, D.R., and Hangartner, L. (2016). Broadly Neutralizing Antibodies to HIV and Their Role in  
673 Vaccine Design. *Annual review of immunology* *34*, 635-659.  
674 Cao, L., Diedrich, J.K., Kulp, D.W., Pauthner, M., He, L., Park, S.R., Sok, D., Su, C.Y., Delahunty,  
675 C.M., Menis, S., *et al.* (2017). Global site-specific N-glycosylation analysis of HIV envelope  
676 glycoprotein. *Nat Commun* *8*, 14954.  
677 Cao, L., Pauthner, M., Andrabi, R., Rantalainen, K., Berndsen, Z., Diedrich, J.K., Menis, S., Sok, D.,  
678 Bastidas, R., Park, S.R., *et al.* (2018). Differential processing of HIV envelope glycans on the virus  
679 and soluble recombinant trimer. *Nat Commun* *9*, 3693.  
680 Casanal, A., Lohkamp, B., and Emsley, P. (2019). Current Developments in Coot for  
681 Macromolecular Model Building of Electron Cryo-microscopy and Crystallographic Data. *Protein*  
682 *science : a publication of the Protein Society*.  
683 Cheng, C., Xu, K., Kong, R., Chuang, G.Y., Corrigan, A.R., Geng, H., Hill, K.R., Jafari, A.J., O'Dell, S.,  
684 Ou, L., *et al.* (2019). Consistent elicitation of cross-clade HIV-neutralizing responses achieved in  
685 guinea pigs after fusion peptide priming by repetitive envelope trimer boosting. *PloS one* *14*,  
686 e0215163.  
687 Christley, S., Scarborough, W., Salinas, E., Rounds, W.H., Toby, I.T., Fonner, J.M., Levin, M.K.,  
688 Kim, M., Mock, S.A., Jordan, C., *et al.* (2018). VDJSerVer: A Cloud-Based Analysis Portal and Data  
689 Commons for Immune Repertoire Sequences and Rearrangements. *Frontiers in immunology* *9*,  
690 976.  
691 Cirelli, K.M., Carnathan, D.G., Nogal, B., Martin, J.T., Rodriguez, O.L., Upadhyay, A.A., Enemuo,  
692 C.A., Gebru, E.H., Choe, Y., Viviano, F., *et al.* (2019). Slow Delivery Immunization Enhances HIV  
693 Neutralizing Antibody and Germinal Center Responses via Modulation of Immunodominance.  
694 *Cell*.  
695 Corcoran, M.M., Phad, G.E., Nestor, V.B., Stahl-Hennig, C., Sumida, N., Persson, M.A., Martin,  
696 M., and Karlsson Hedestam, G.B. (2016). Production of individualized V gene databases reveals  
697 high levels of immunoglobulin genetic diversity. *Nat Commun* *7*, 13642.  
698 de Taeye, S.W., Ozorowski, G., Torrents de la Pena, A., Guttman, M., Julien, J.P., van den  
699 Kerkhof, T.L., Burger, J.A., Pritchard, L.K., Pugach, P., Yasmeen, A., *et al.* (2015). Immunogenicity  
700 of Stabilized HIV-1 Envelope Trimers with Reduced Exposure of Non-neutralizing Epitopes. *Cell*  
701 *163*, 1702-1715.  
702 Derking, R., Ozorowski, G., Sliopen, K., Yasmeen, A., Cupo, A., Torres, J.L., Julien, J.P., Lee, J.H.,  
703 van Montfort, T., de Taeye, S.W., *et al.* (2015). Comprehensive antigenic map of a cleaved  
704 soluble HIV-1 envelope trimer. *PLoS pathogens* *11*, e1004767.



705 DiMaio, F., Tyka, M.D., Baker, M.L., Chiu, W., and Baker, D. (2009). Refinement of protein  
706 structures into low-resolution density maps using rosetta. *Journal of molecular biology* *392*,  
707 181-190.

708 Dubrovskaya, V., Tran, K., Ozorowski, G., Guenaga, J., Wilson, R., Bale, S., Cottrell, C.A., Turner,  
709 H.L., Seabright, G., O'Dell, S., *et al.* (2019). Vaccination with Glycan-Modified HIV NFL Envelope  
710 Trimer-Liposomes Elicits Broadly Neutralizing Antibodies to Multiple Sites of Vulnerability.  
711 *Immunity* *51*, 915-929 e917.

712 Emsley, P., Lohkamp, B., Scott, W.G., and Cowtan, K. (2010). Features and development of Coot.  
713 *Acta crystallographica Section D, Biological crystallography* *66*, 486-501.

714 Escolano, A., Gristick, H.B., Abernathy, M.E., Merckenschlager, J., Gautam, R., Oliveira, T.Y., Pai,  
715 J., West, A.P., Jr., Barnes, C.O., Cohen, A.A., *et al.* (2019). Immunization expands B cells specific  
716 to HIV-1 V3 glycan in mice and macaques. *Nature* *570*, 468-473.

717 Escolano, A., Steichen, J.M., Dosenovic, P., Kulp, D.W., Golijanin, J., Sok, D., Freund, N.T., Gitlin,  
718 A.D., Oliveira, T., Araki, T., *et al.* (2016). Sequential Immunization Elicits Broadly Neutralizing  
719 Anti-HIV-1 Antibodies in Ig Knockin Mice. *Cell* *166*, 1445-1458 e1412.

720 Frenz, B., Ramisch, S., Borst, A.J., Walls, A.C., Adolf-Bryfogle, J., Schief, W.R., Veesler, D., and  
721 DiMaio, F. (2018). Automatically Fixing Errors in Glycoprotein Structures with Rosetta.  
722 *Structure*.

723 Gadala-Maria, D., Yaari, G., Uduman, M., and Kleinstein, S.H. (2015). Automated analysis of  
724 high-throughput B-cell sequencing data reveals a high frequency of novel immunoglobulin V  
725 gene segment alleles. *Proceedings of the National Academy of Sciences of the United States of*  
726 *America* *112*, E862-870.

727 Georgiev, I.S., Joyce, M.G., Chen, R.E., Leung, K., McKee, K., Druz, A., Van Galen, J.G., Kanekiyo,  
728 M., Tsybovsky, Y., Yang, E.S., *et al.* (2018). Two-Component Ferritin Nanoparticles for  
729 Multimerization of Diverse Trimeric Antigens. *ACS Infect Dis* *4*, 788-796.

730 Guo, K., Halemano, K., Schmitt, K., Katuwal, M., Wang, Y., Harper, M.S., Heilman, K.J., Kuwata,  
731 T., Stephens, E.B., and Santiago, M.L. (2015). Immunoglobulin VH gene diversity and somatic  
732 hypermutation during SIV infection of rhesus macaques. *Immunogenetics* *67*, 355-370.

733 Jardine, J.G., Kulp, D.W., Havenar-Daughton, C., Sarkar, A., Briney, B., Sok, D., Sesterhenn, F.,  
734 Ereno-Orbea, J., Kalyuzhniy, O., Deresa, I., *et al.* (2016). HIV-1 broadly neutralizing antibody  
735 precursor B cells revealed by germline-targeting immunogen. *Science* *351*, 1458-1463.

736 Johnson, M., Zaretskaya, I., Raytselis, Y., Merezhuk, Y., McGinnis, S., and Madden, T.L. (2008).  
737 NCBI BLAST: a better web interface. *Nucleic Acids Res* *36*, W5-9.

738 Julien, J.P., Cupo, A., Sok, D., Stanfield, R.L., Lyumkis, D., Deller, M.C., Klasse, P.J., Burton, D.R.,  
739 Sanders, R.W., Moore, J.P., *et al.* (2013a). Crystal structure of a soluble cleaved HIV-1 envelope  
740 trimer. *Science* *342*, 1477-1483.

741 Julien, J.P., Sok, D., Khayat, R., Lee, J.H., Doores, K.J., Walker, L.M., Ramos, A., Diwanji, D.C.,  
742 Pejchal, R., Cupo, A., *et al.* (2013b). Broadly neutralizing antibody PGT121 allosterically  
743 modulates CD4 binding via recognition of the HIV-1 gp120 V3 base and multiple surrounding  
744 glycans. *PLoS pathogens* *9*, e1003342.

745 Kabat, E.A. (1991). Sequences of proteins of immunological interest : tabulation and analysis of  
746 amino acid and nucleic acid sequences of precursors, V-regions, C-regions, J-chain, T-cell  
747 receptors for antigenm T-cell surface antigens, [beta]2-microglobulins, major histocompatibility  
748 antigens, Thy-1, complement, C-reactive protein, thymopoietin, integrins, post-gamme globulin,

749 [alpha]2-macroglobulins, and other related proteins, 5th edn (Bethesda, Md. (Bethesda,  
750 20892): U.S. Dept. of Health and Human Services, Public Health Service, National Institutes of  
751 Health).

752 Klasse, P.J., Ketas, T.J., Cottrell, C.A., Ozorowski, G., Debnath, G., Camara, D., Francomano, E.,  
753 Pugach, P., Ringe, R.P., LaBranche, C.C., *et al.* (2018). Epitopes for neutralizing antibodies  
754 induced by HIV-1 envelope glycoprotein BG505 SOSIP trimers in rabbits and macaques. *PLoS*  
755 *pathogens* *14*, e1006913.

756 Kong, R., Duan, H., Sheng, Z., Xu, K., Acharya, P., Chen, X., Cheng, C., Dingens, A.S., Gorman, J.,  
757 Sastry, M., *et al.* (2019). Antibody Lineages with Vaccine-Induced Antigen-Binding Hotspots  
758 Develop Broad HIV Neutralization. *Cell* *178*, 567-584 e519.

759 Kong, R., Xu, K., Zhou, T., Acharya, P., Lemmin, T., Liu, K., Ozorowski, G., Soto, C., Taft, J.D.,  
760 Bailer, R.T., *et al.* (2016). Fusion peptide of HIV-1 as a site of vulnerability to neutralizing  
761 antibody. *Science* *352*, 828-833.

762 Krissinel, E. (2015). Stock-based detection of protein oligomeric states in jsPISA. *Nucleic Acids*  
763 *Res* *43*, W314-319.

764 Kulp, D.W., Steichen, J.M., Pauthner, M., Hu, X., Schiffner, T., Liguori, A., Cottrell, C.A., Havenar-  
765 Daughton, C., Ozorowski, G., Georgeson, E., *et al.* (2017). Structure-based design of native-like  
766 HIV-1 envelope trimers to silence non-neutralizing epitopes and eliminate CD4 binding. *Nat*  
767 *Commun* *8*, 1655.

768 Landais, E., and Moore, P.L. (2018). Development of broadly neutralizing antibodies in HIV-1  
769 infected elite neutralizers. *Retrovirology* *15*, 61.

770 Lee, J.H., Andrabi, R., Su, C.Y., Yasmeen, A., Julien, J.P., Kong, L., Wu, N.C., McBride, R., Sok, D.,  
771 Pauthner, M., *et al.* (2017). A Broadly Neutralizing Antibody Targets the Dynamic HIV Envelope  
772 Trimer Apex via a Long, Rigidified, and Anionic beta-Hairpin Structure. *Immunity* *46*, 690-702.

773 Lei, L., Yang, Y.R., Tran, K., Wang, Y., Chiang, C.I., Ozorowski, G., Xiao, Y., Ward, A.B., Wyatt, R.T.,  
774 and Li, Y. (2019). The HIV-1 Envelope Glycoprotein C3/V4 Region Defines a Prevalent  
775 Neutralization Epitope following Immunization. *Cell Rep* *27*, 586-598 e586.

776 Lyumkis, D., Julien, J.P., de Val, N., Cupo, A., Potter, C.S., Klasse, P.J., Burton, D.R., Sanders,  
777 R.W., Moore, J.P., Carragher, B., *et al.* (2013). Cryo-EM structure of a fully glycosylated soluble  
778 cleaved HIV-1 envelope trimer. *Science* *342*, 1484-1490.

779 Martinez-Murillo, P., Tran, K., Guenaga, J., Lindgren, G., Adori, M., Feng, Y., Phad, G.E., Vazquez  
780 Bernat, N., Bale, S., Ingale, J., *et al.* (2017). Particulate Array of Well-Ordered HIV Clade C Env  
781 Trimers Elicits Neutralizing Antibodies that Display a Unique V2 Cap Approach. *Immunity* *46*,  
782 804-817 e807.

783 McCoy, A.J., Grosse-Kunstleve, R.W., Adams, P.D., Winn, M.D., Storoni, L.C., and Read, R.J.  
784 (2007). Phaser crystallographic software. *J Appl Crystallogr* *40*, 658-674.

785 McCoy, L.E., van Gils, M.J., Ozorowski, G., Messmer, T., Briney, B., Voss, J.E., Kulp, D.W.,  
786 Macauley, M.S., Sok, D., Pauthner, M., *et al.* (2016). Holes in the Glycan Shield of the Native HIV  
787 Envelope Are a Target of Trimer-Elicited Neutralizing Antibodies. *Cell Rep* *16*, 2327-2338.

788 Moldt, B., Le, K.M., Carnathan, D.G., Whitney, J.B., Schultz, N., Lewis, M.G., Borducchi, E.N.,  
789 Smith, K.M., Mackel, J.J., Sweat, S.L., *et al.* (2016). Neutralizing antibody affords comparable  
790 protection against vaginal and rectal simian/human immunodeficiency virus challenge in  
791 macaques. *Aids* *30*, 1543-1551.

792 Nogal, B., Bianchi, M., Cottrell, C.A., Kirchdoerfer, R.N., Sewall, L.M., Turner, H.L., Zhao, F., Sok,  
793 D., Burton, D.R., Hangartner, L., *et al.* (2019). Mapping polyclonal antibody responses in non-  
794 human primates vaccinated with HIV Env trimer subunit vaccines. *bioRxiv*, 833715.  
795 Otwinowski, Z., and Minor, W. (1997). Processing of X-ray diffraction data collected in  
796 oscillation mode. *Methods Enzymol* 276, 307-326.  
797 Pancera, M., Zhou, T., Druz, A., Georgiev, I.S., Soto, C., Gorman, J., Huang, J., Acharya, P.,  
798 Chuang, G.Y., Ofek, G., *et al.* (2014). Structure and immune recognition of trimeric pre-fusion  
799 HIV-1 Env. *Nature* 514, 455-461.  
800 Pauthner, M., Havenar-Daughton, C., Sok, D., Nkolola, J.P., Bastidas, R., Boopathy, A.V.,  
801 Carnathan, D.G., Chandrashekar, A., Cirelli, K.M., Cottrell, C.A., *et al.* (2017). Elicitation of  
802 Robust Tier 2 Neutralizing Antibody Responses in Nonhuman Primates by HIV Envelope Trimer  
803 Immunization Using Optimized Approaches. *Immunity* 46, 1073-1088 e1076.  
804 Pauthner, M.G., Nkolola, J.P., Havenar-Daughton, C., Murrell, B., Reiss, S.M., Bastidas, R.,  
805 Prevost, J., Nedellec, R., von Bredow, B., Abbink, P., *et al.* (2019). Vaccine-Induced Protection  
806 from Homologous Tier 2 SHIV Challenge in Nonhuman Primates Depends on Serum-Neutralizing  
807 Antibody Titers. *Immunity* 50, 241-252 e246.  
808 Pegu, A., Borate, B., Huang, Y.D., Pauthner, M.G., Hessel, A.J., Julg, B., Doria-Rose, N.A.,  
809 Schmidt, S.D., Carpp, L.N., Cully, M.D., *et al.* (2019). A Meta-analysis of Passive Immunization  
810 Studies Shows that Serum-Neutralizing Antibody Titer Associates with Protection against SHIV  
811 Challenge. *Cell Host & Microbe* 26, 336-+.  
812 Pettersen, E.F., Goddard, T.D., Huang, C.C., Couch, G.S., Greenblatt, D.M., Meng, E.C., and  
813 Ferrin, T.E. (2004). UCSF Chimera--a visualization system for exploratory research and analysis. *J*  
814 *Comput Chem* 25, 1605-1612.  
815 Phad, G.E., Pushparaj, P., Tran, K., Dubrovskaya, V., Adori, M., Martinez-Murillo, P., Vazquez  
816 Bernat, N., Singh, S., Dionne, G., O'Dell, S., *et al.* (2020). Extensive dissemination and intraclonal  
817 maturation of HIV Env vaccine-induced B cell responses. *The Journal of experimental medicine*  
818 217.  
819 Pintilie, G.D., Zhang, J., Goddard, T.D., Chiu, W., and Gossard, D.C. (2010). Quantitative analysis  
820 of cryo-EM density map segmentation by watershed and scale-space filtering, and fitting of  
821 structures by alignment to regions. *Journal of structural biology* 170, 427-438.  
822 Pugach, P., Ozorowski, G., Cupo, A., Ringe, R., Yasmeen, A., de Val, N., Derking, R., Kim, H.J.,  
823 Korzun, J., Golabek, M., *et al.* (2015). A native-like SOSIP.664 trimer based on an HIV-1 subtype  
824 B env gene. *J Virol* 89, 3380-3395.  
825 Punjani, A., Rubinstein, J.L., Fleet, D.J., and Brubaker, M.A. (2017). cryoSPARC: algorithms for  
826 rapid unsupervised cryo-EM structure determination. *Nature methods* 14, 290-296.  
827 Ralph, D.K., and Matsen, F.A.I. (2018). Per-sample immunoglobulin germline inference from B  
828 cell receptor deep sequencing data. *arXiv*.  
829 Ramesh, A., Darko, S., Hua, A., Overman, G., Ransier, A., Francica, J.R., Trama, A., Tomaras, G.D.,  
830 Haynes, B.F., Douek, D.C., *et al.* (2017). Structure and Diversity of the Rhesus Macaque  
831 Immunoglobulin Loci through Multiple De Novo Genome Assemblies. *Frontiers in immunology*  
832 8, 1407.  
833 Ringe, R.P., Cruz Portillo, V.M., Dosenovic, P., Ketas, T.J., Ozorowski, G., Nogal, B., Perez, L.,  
834 LaBranche, C.C., Lim, J., Francomano, E., *et al.* (2019). Neutralizing antibody induction by HIV-1

835 Envelope glycoprotein SOSIP trimers on iron oxide nanoparticles may be impaired by mannose  
836 binding lectin. *J Virol*.

837 Sanders, R.W., Derking, R., Cupo, A., Julien, J.P., Yasmeeen, A., de Val, N., Kim, H.J., Blattner, C.,  
838 de la Pena, A.T., Korzun, J., *et al.* (2013). A next-generation cleaved, soluble HIV-1 Env trimer,  
839 BG505 SOSIP.664 gp140, expresses multiple epitopes for broadly neutralizing but not non-  
840 neutralizing antibodies. *PLoS pathogens* *9*, e1003618.

841 Sanders, R.W., van Gils, M.J., Derking, R., Sok, D., Ketas, T.J., Burger, J.A., Ozorowski, G., Cupo,  
842 A., Simonich, C., Goo, L., *et al.* (2015). HIV-1 VACCINES. HIV-1 neutralizing antibodies induced by  
843 native-like envelope trimers. *Science* *349*, aac4223.

844 Sievers, F., and Higgins, D.G. (2018). Clustal Omega for making accurate alignments of many  
845 protein sequences. *Protein science : a publication of the Protein Society* *27*, 135-145.

846 Sok, D., van Gils, M.J., Pauthner, M., Julien, J.P., Saye-Francisco, K.L., Hsueh, J., Briney, B., Lee,  
847 J.H., Le, K.M., Lee, P.S., *et al.* (2014). Recombinant HIV envelope trimer selects for quaternary-  
848 dependent antibodies targeting the trimer apex. *Proceedings of the National Academy of*  
849 *Sciences of the United States of America* *111*, 17624-17629.

850 Steichen, J.M., Kulp, D.W., Tokatlian, T., Escolano, A., Dosenovic, P., Stanfield, R.L., McCoy, L.E.,  
851 Ozorowski, G., Hu, X., Kalyuzhnyi, O., *et al.* (2016). HIV Vaccine Design to Target Germline  
852 Precursors of Glycan-Dependent Broadly Neutralizing Antibodies. *Immunity* *45*, 483-496.

853 Struwe, W.B., Chertova, E., Allen, J.D., Seabright, G.E., Watanabe, Y., Harvey, D.J., Medina-  
854 Ramirez, M., Roser, J.D., Smith, R., Westcott, D., *et al.* (2018). Site-Specific Glycosylation of  
855 Virion-Derived HIV-1 Env Is Mimicked by a Soluble Trimeric Immunogen. *Cell Rep* *24*, 1958-1966  
856 e1955.

857 Suloway, C., Pulokas, J., Fellmann, D., Cheng, A., Guerra, F., Quispe, J., Stagg, S., Potter, C.S., and  
858 Carragher, B. (2005). Automated molecular microscopy: the new Legimon system. *Journal of*  
859 *structural biology* *151*, 41-60.

860 Torrents de la Pena, A., Julien, J.P., de Taeye, S.W., Garces, F., Guttman, M., Ozorowski, G.,  
861 Pritchard, L.K., Behrens, A.J., Go, E.P., Burger, J.A., *et al.* (2017). Improving the Immunogenicity  
862 of Native-like HIV-1 Envelope Trimers by Hyperstabilization. *Cell Rep* *20*, 1805-1817.

863 Turchaninova, M.A., Davydov, A., Britanova, O.V., Shugay, M., Bikos, V., Egorov, E.S., Kirgizova,  
864 V.I., Merzlyak, E.M., Staroverov, D.B., Bolotin, D.A., *et al.* (2016). High-quality full-length  
865 immunoglobulin profiling with unique molecular barcoding. *Nature protocols* *11*, 1599-1616.

866 UNAIDS (2019). Global HIV & AIDS statistics — 2018 fact sheet.

867 van Beusekom, B., Wezel, N., Hekkelman, M.L., Perrakis, A., Emsley, P., and Joosten, R.P. (2019).  
868 Building and rebuilding N-glycans in protein structure models. *Acta Crystallogr D Struct Biol* *75*,  
869 416-425.

870 van Gils, M.J., van den Kerkhof, T.L., Ozorowski, G., Cottrell, C.A., Sok, D., Pauthner, M.,  
871 Pallesen, J., de Val, N., Yasmeeen, A., de Taeye, S.W., *et al.* (2016). An HIV-1 antibody from an  
872 elite neutralizer implicates the fusion peptide as a site of vulnerability. *Nat Microbiol* *2*, 16199.

873 Vigdorovich, V., Oliver, B.G., Carbonetti, S., Dambrauskas, N., Lange, M.D., Yacoob, C., Leahy,  
874 W., Callahan, J., Stamatatos, L., and Sather, D.N. (2016). Repertoire comparison of the B-cell  
875 receptor-encoding loci in humans and rhesus macaques by next-generation sequencing. *Clin*  
876 *Transl Immunology* *5*, e93.

877 Wang, Y., O'Dell, S., Turner, H.L., Chiang, C.I., Lei, L., Guenaga, J., Wilson, R., Martinez-Murillo,  
878 P., Doria-Rose, N., Ward, A.B., *et al.* (2017). HIV-1 Cross-Reactive Primary Virus Neutralizing  
879 Antibody Response Elicited by Immunization in Nonhuman Primates. *J Virol* 91.  
880 Williams, C.J., Headd, J.J., Moriarty, N.W., Prisant, M.G., Videau, L.L., Deis, L.N., Verma, V.,  
881 Keedy, D.A., Hintze, B.J., Chen, V.B., *et al.* (2018). MolProbity: More and better reference data  
882 for improved all-atom structure validation. *Protein science : a publication of the Protein Society*  
883 27, 293-315.  
884 Wu, X. (2018). HIV Broadly Neutralizing Antibodies: VRC01 and Beyond. *Adv Exp Med Biol* 1075,  
885 53-72.  
886 Xu, K., Acharya, P., Kong, R., Cheng, C., Chuang, G.Y., Liu, K., Louder, M.K., O'Dell, S., Rawi, R.,  
887 Sastry, M., *et al.* (2018). Epitope-based vaccine design yields fusion peptide-directed antibodies  
888 that neutralize diverse strains of HIV-1. *Nature medicine* 24, 857-867.  
889 Yang, L., Sharma, S.K., Cottrell, C., Guenaga, J., Tran, K., Wilson, R., Behrens, A.J., Crispin, M., de  
890 Val, N., and Wyatt, R.T. (2018). Structure-Guided Redesign Improves NFL HIV Env Trimer  
891 Integrity and Identifies an Inter-Protomer Disulfide Permitting Post-Expression Cleavage.  
892 *Frontiers in immunology* 9, 1631.  
893 Ye, J., Ma, N., Madden, T.L., and Ostell, J.M. (2013). IgBLAST: an immunoglobulin variable  
894 domain sequence analysis tool. *Nucleic Acids Res* 41, W34-40.  
895 Yuan, M., Cottrell, C.A., Ozorowski, G., van Gils, M.J., Kumar, S., Wu, N.C., Sarkar, A., Torres, J.L.,  
896 de Val, N., Copps, J., *et al.* (2019). Conformational Plasticity in the HIV-1 Fusion Peptide  
897 Facilitates Recognition by Broadly Neutralizing Antibodies. *Cell Host Microbe* 25, 873-883 e875.  
898 Zhang, K. (2016). Gctf: Real-time CTF determination and correction. *Journal of structural biology*  
899 193, 1-12.  
900 Zheng, S.Q., Palovcak, E., Armache, J.P., Verba, K.A., Cheng, Y., and Agard, D.A. (2017).  
901 MotionCor2: anisotropic correction of beam-induced motion for improved cryo-electron  
902 microscopy. *Nature methods* 14, 331-332.  
903 Zimin, A.V., Cornish, A.S., Maudhoo, M.D., Gibbs, R.M., Zhang, X., Pandey, S., Meehan, D.T.,  
904 Wipfler, K., Bosinger, S.E., Johnson, Z.P., *et al.* (2014). A new rhesus macaque assembly and  
905 annotation for next-generation sequencing analyses. *Biol Direct* 9, 20.  
906 Zivanov, J., Nakane, T., Forsberg, B.O., Kimanius, D., Hagen, W.J., Lindahl, E., and Scheres, S.H.  
907 (2018). New tools for automated high-resolution cryo-EM structure determination in RELION-3.  
908 *eLife* 7.  
909

**A**

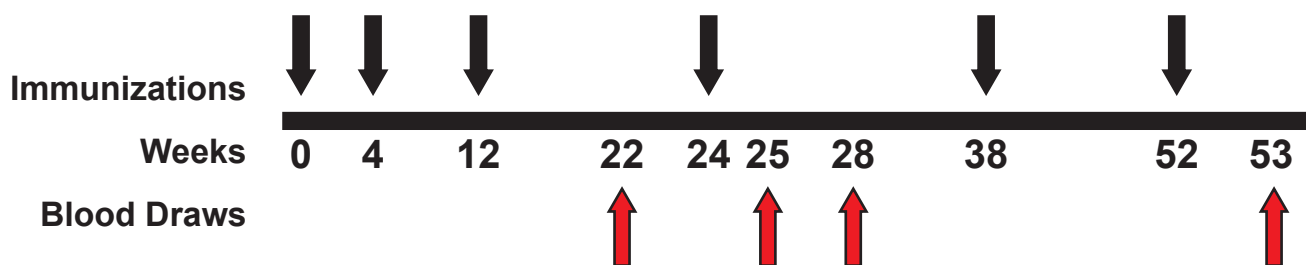

**B**

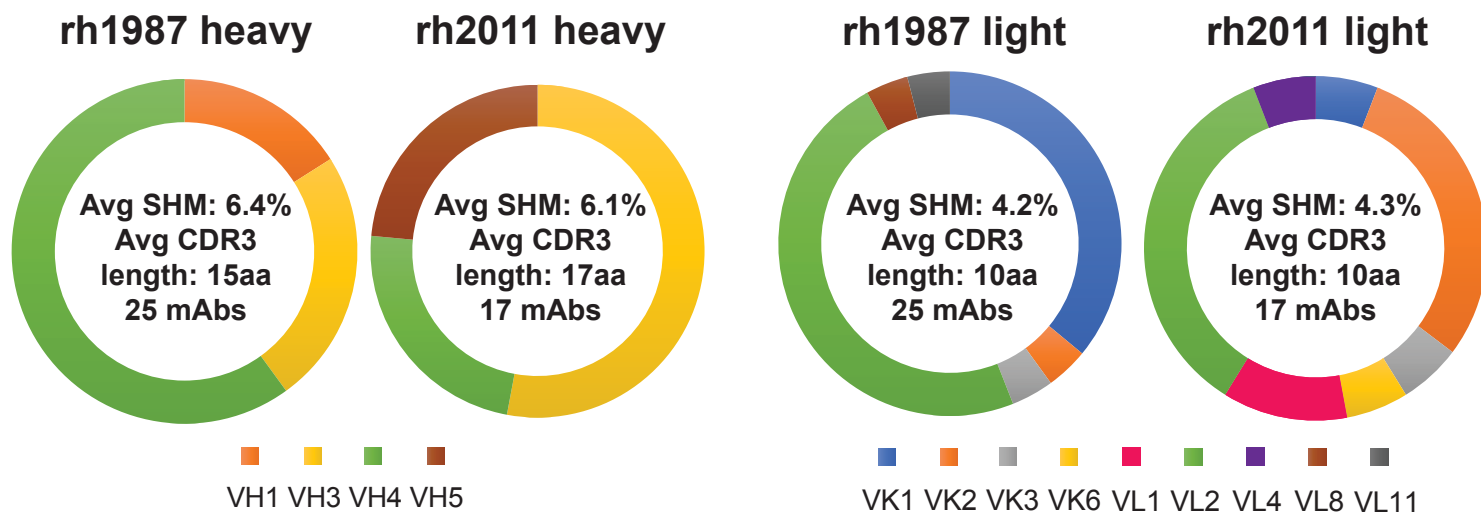

**C**

**rh1987**

| mAb    | BG505 T332N | BG505 T332N+N611A | SF162 |
|--------|-------------|-------------------|-------|
| RM19A  | 41.8        | >50               | >50   |
| RM19A1 | 44.9        | >50               | >50   |
| RM19A2 | >50         | >50               | >50   |
| RM19A3 | >50         | >50               | >50   |
| RM19B1 | >50         | >50               | >50   |
| RM19C3 | >50         | >50               | >50   |
| RM19C4 | >50         | >50               | >50   |
| RM19D  | >50         | >50               | >50   |
| RM19J  | >50         | >50               | >50   |
| RM19M  | 12.9        | 5.63              | >50   |
| RM19N  | >50         | >50               | >50   |
| RM19O  | >50         | 25.5              | >50   |
| RM19P  | 23.5        | >50               | >50   |
| RM19R  | >50         | >50               | >50   |
| RM19S  | >50         | 3.51              | >50   |
| RM19T  | >50         | >50               | >50   |

IC<sub>50</sub> (µg/mL)

**D**

**rh2011**

| mAb    | BG505 T332N | BG505 T332N+N611A | SF162 |
|--------|-------------|-------------------|-------|
| RM20A3 | >50         | >50               | >50   |
| RM20B  | >50         | >50               | >50   |
| RM20C  | >50         | >50               | >50   |
| RM20D  | >50         | >50               | >50   |
| RM20E  | >50         | <0.41             | >50   |
| RM20E1 | >50         | <0.41             | >50   |
| RM20E2 | >50         | <0.41             | >50   |
| RM20E3 | >50         | <0.41             | >50   |
| RM20F  | 1.6         | <0.41             | >50   |
| RM20H  | 42.9        | <0.41             | >50   |
| RM20I  | >50         | >50               | >50   |
| RM20J  | >50         | >50               | >50   |

IC<sub>50</sub> (µg/mL)

**A**

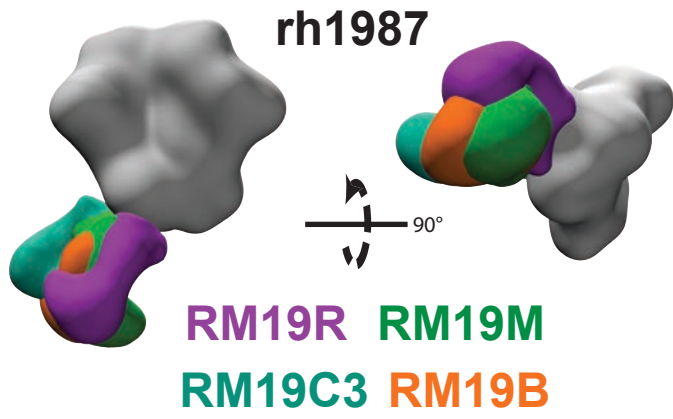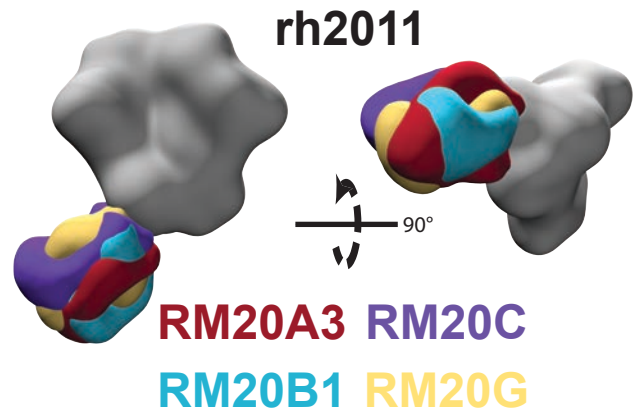

**B**

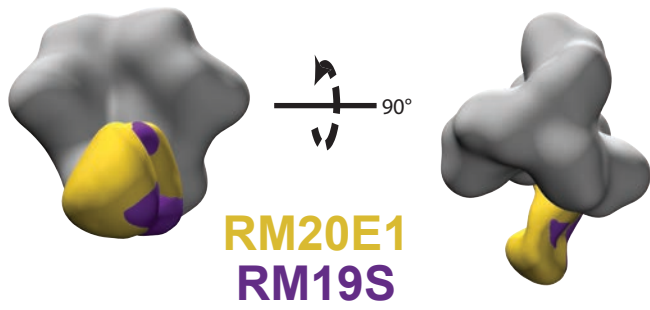

**C**

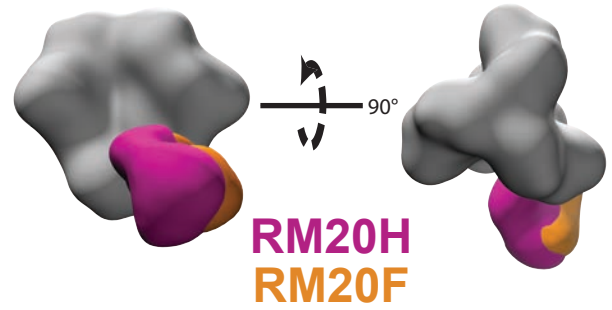

**D**

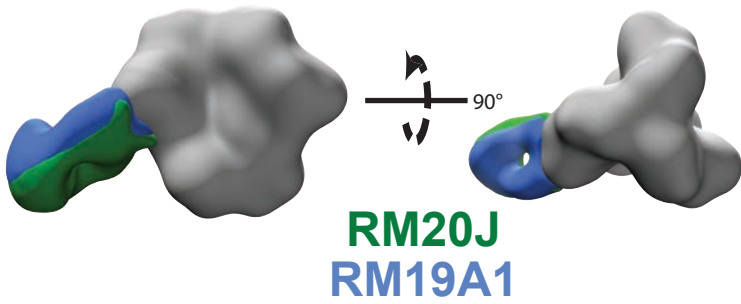

**E**

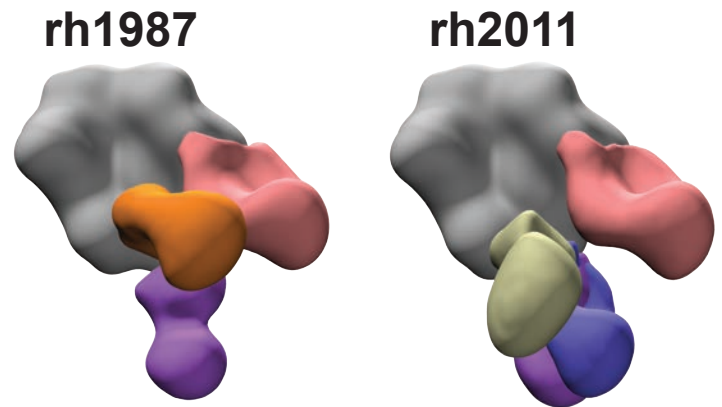

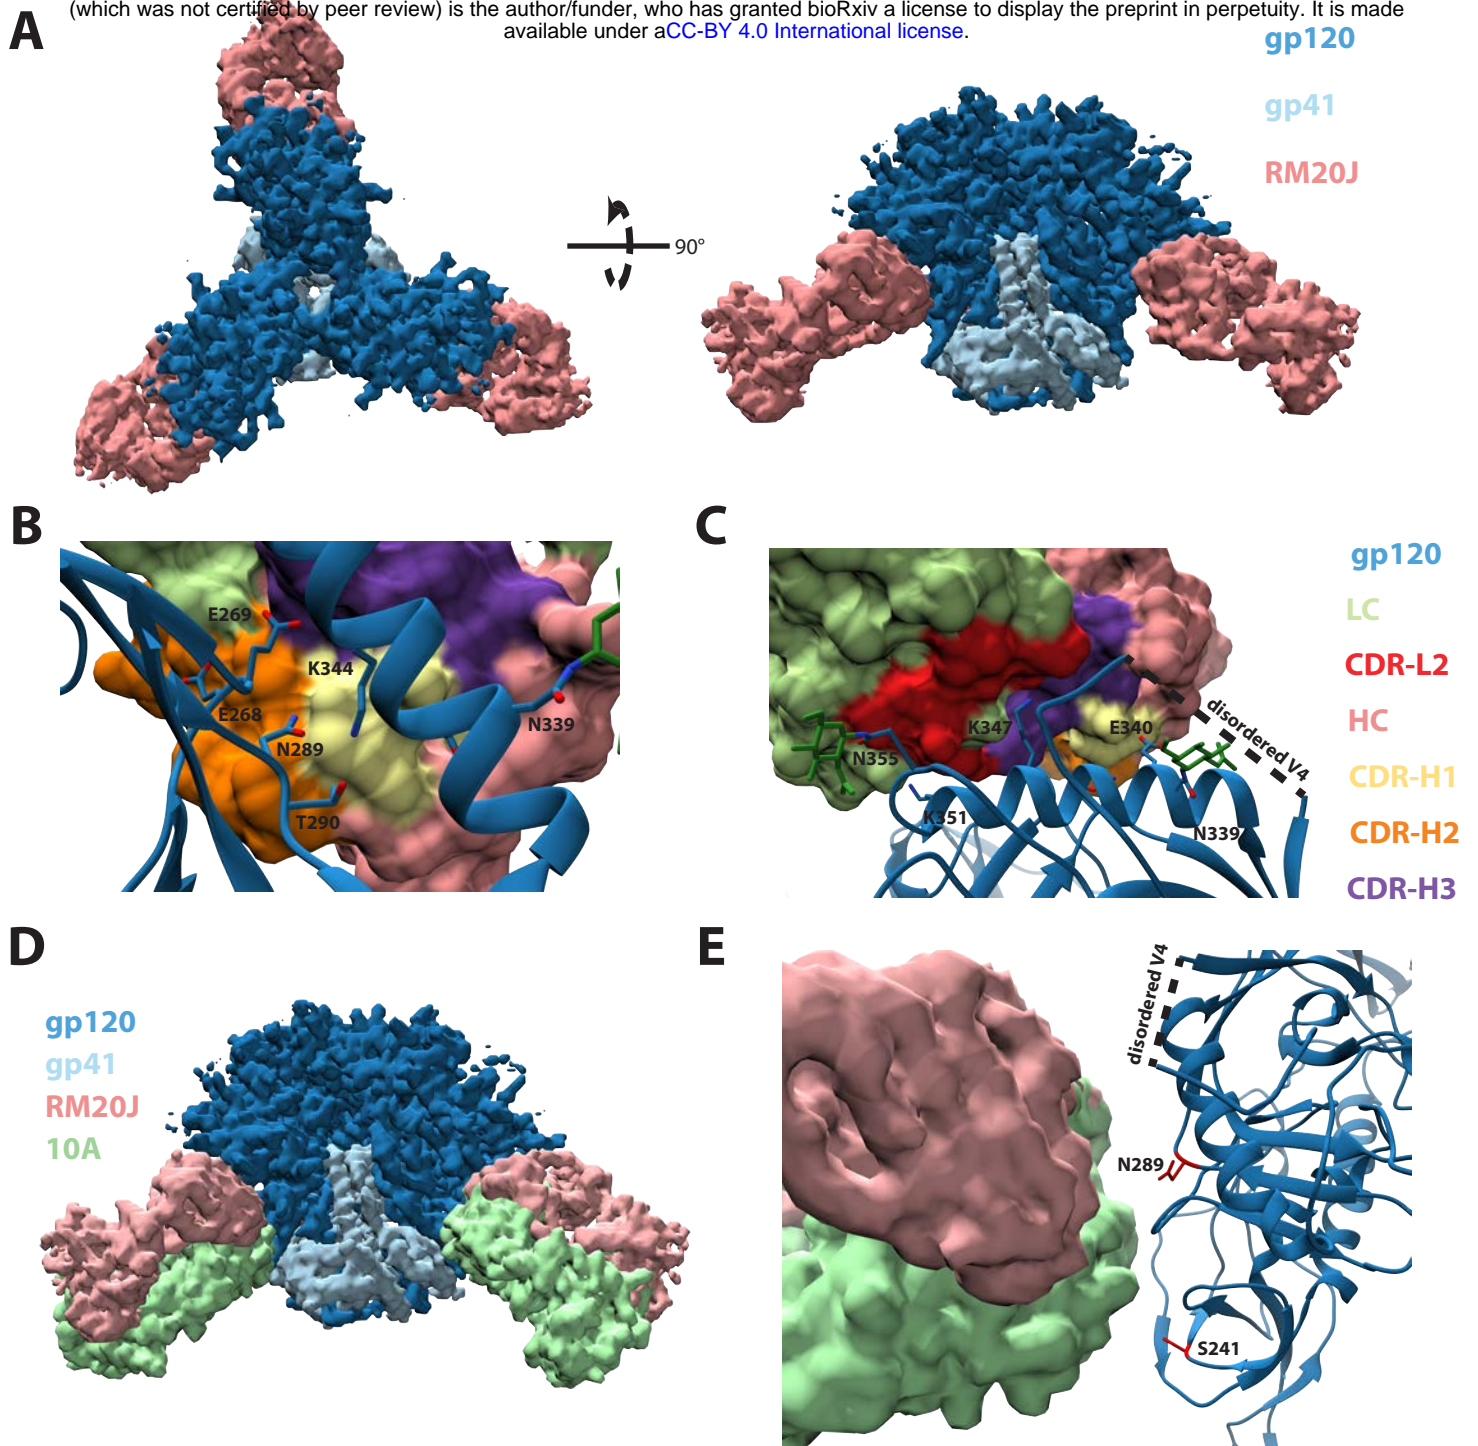



**A**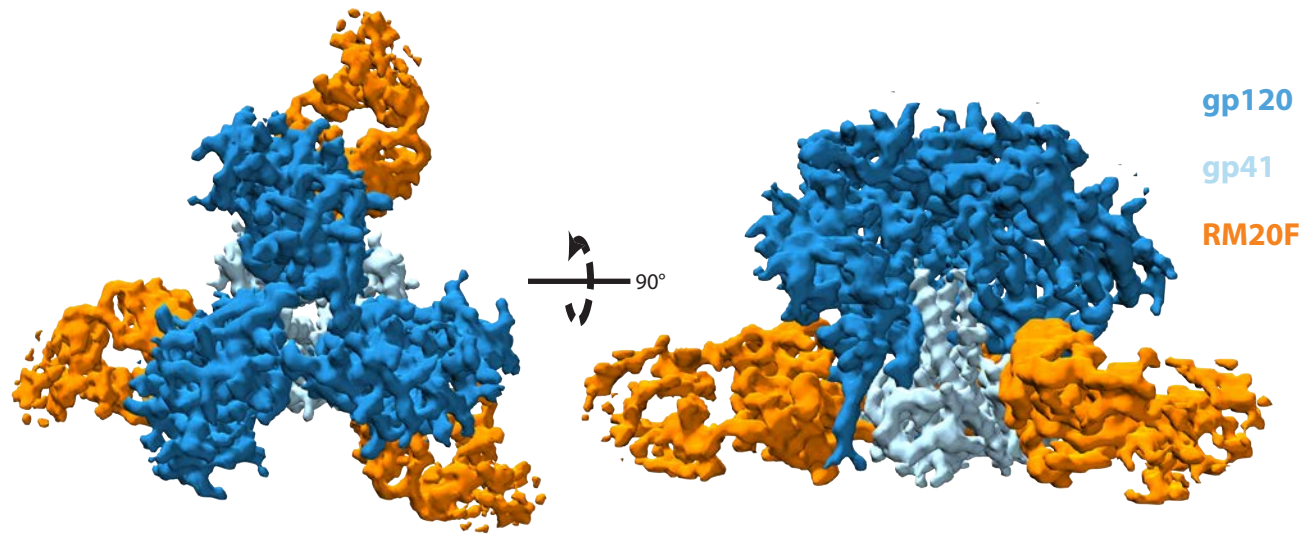**B**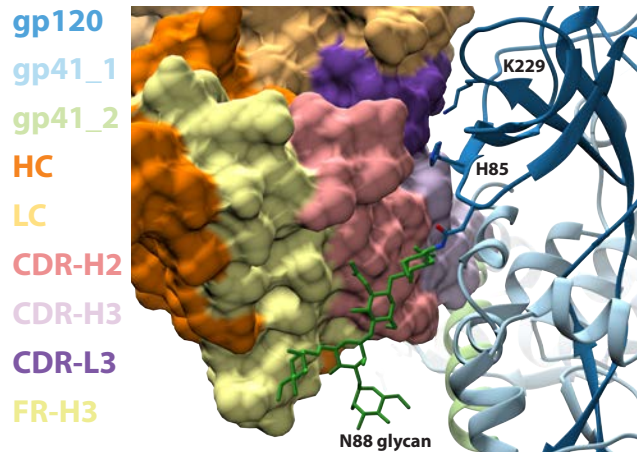**C**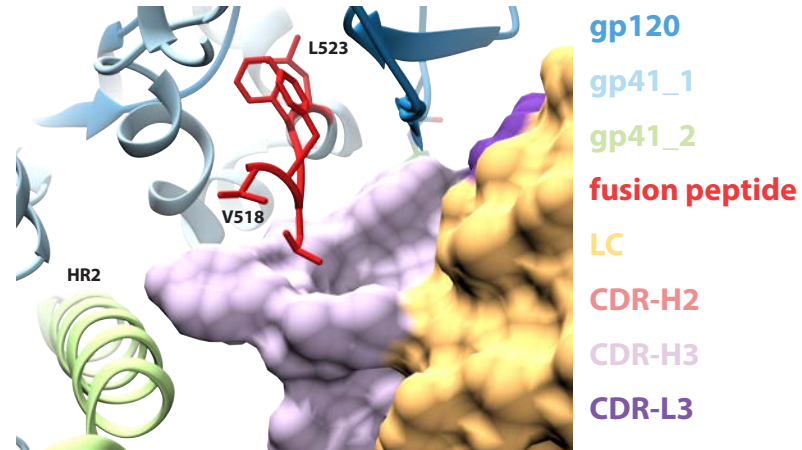**D**

|       | VRC01 | RM20F | VRC34 |
|-------|-------|-------|-------|
| WT    | 1.0   | 1.0   | 1.0   |
| H85A  | 1.2   | 11.9  | 4.7   |
| E87A  | 1.2   | 4.3   | 0.8   |
| N88A  | 1     | >28   | >24   |
| K229A | 0.6   | 3.1   | 1.2   |
| S241N | 1.1   | 6.6   | n.d.  |
| E267A | 0.8   | 1.3   | 0.9   |
| P291T | 1.1   | 2.9   | n.d.  |
| N332T | 0.9   | 0.5   | n.d.  |
| F522A | 0.8   | 3.9   | 1.0   |
| M535A | 0.9   | 2.9   | 1.0   |
| T536A | 0.8   | 2.9   | 1.5   |
| T538A | 0.8   | 3.6   | 1.2   |
| N611Q | 1.5   | <0.1  | n.d.  |
| N625Q | 1.9   | 0.6   | n.d.  |
| N637Q | 1.6   | 1.2   | n.d.  |
| G644A | 1.0   | 4.2   | 1.8   |
| E647A | 1.7   | 13.5  | 0.6   |

fold reduction in neutralization

**A**

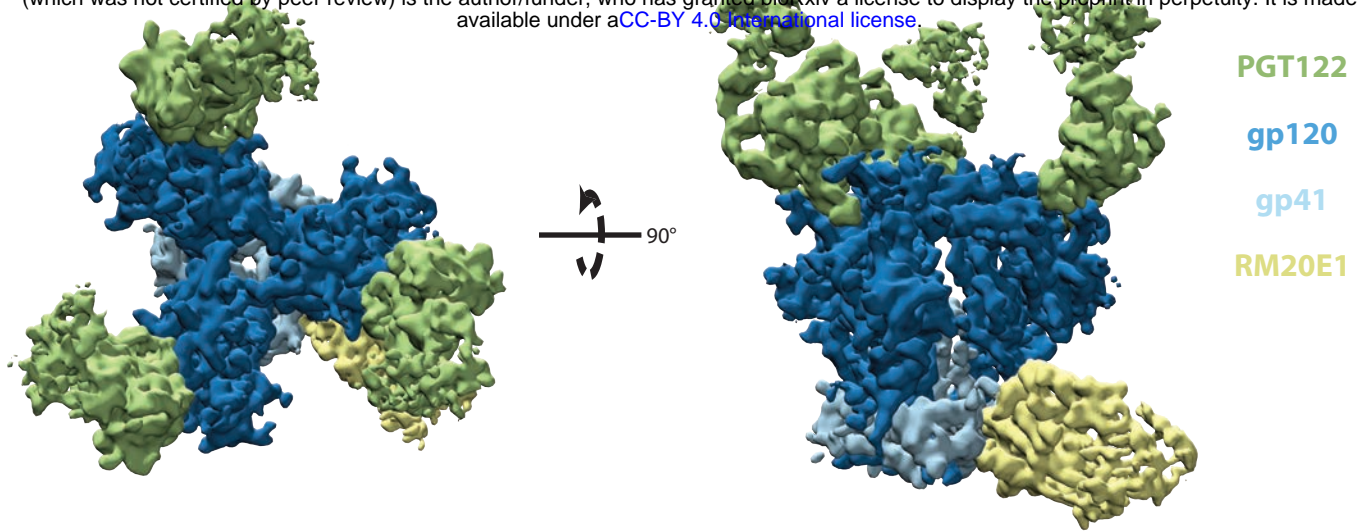

**B**

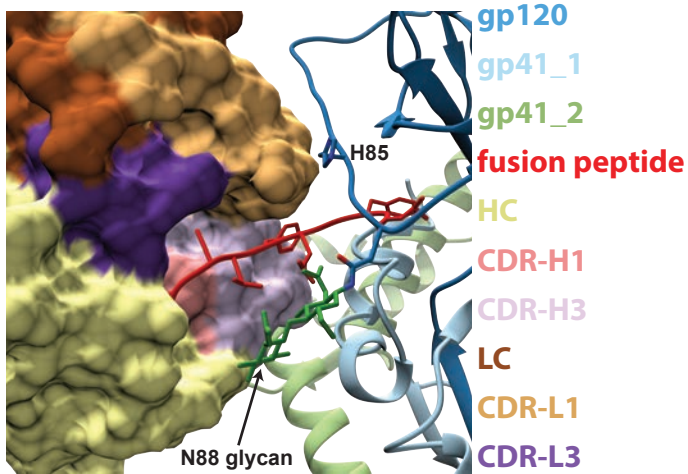

**C**

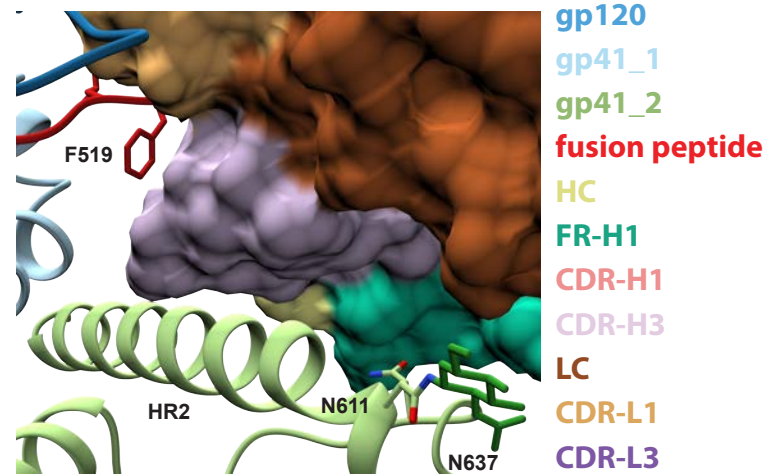

**D**

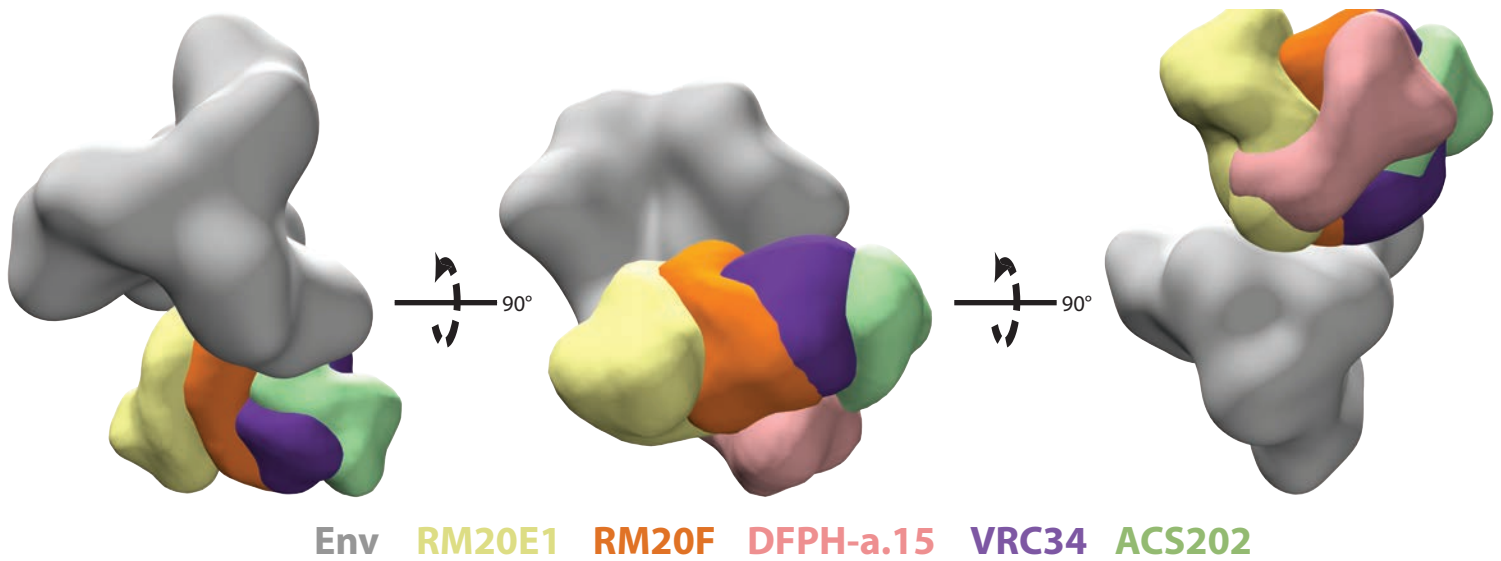

Source: https://www.biorxiv.org/content/biorxiv/early/2020/02/07/2020.02.05.936096.full.pdf
